1 **MARCO<sup>+</sup> lymphatic endothelial cells sequester arboviruses to limit viremia and viral**  
2 **dissemination**

3

4 Kathryn S. Carpentier<sup>1</sup>, Ryan M. Sheridan<sup>2</sup>, Cormac J. Lucas<sup>1</sup>, Bennett J. Davenport<sup>1</sup>, Frances  
5 S. Li<sup>1</sup>, Erin D. Lucas<sup>1</sup>, Mary K. McCarthy<sup>1</sup>, Glennys V. Reynoso<sup>3</sup>, Nicolas A. May<sup>1</sup>, Beth A.J.  
6 Tamburini<sup>1,5</sup>, Jay R. Hesselberth<sup>2,4</sup>, Heather D. Hickman<sup>3</sup>, and Thomas E. Morrison<sup>1\*</sup>

7

8 <sup>1</sup>Department of Immunology and Microbiology, University of Colorado School of Medicine, Aurora,  
9 Colorado, 80045 USA

10 <sup>2</sup>RNA Bioscience Initiative, University of Colorado School of Medicine, Aurora, Colorado, 80045  
11 USA

12 <sup>3</sup>Viral Immunity and Pathogenesis Unit, Laboratory of Clinical Microbiology and Immunology,  
13 National Institutes of Allergy and Infectious Diseases, NIH, Bethesda, Maryland, 20892 USA

14 <sup>4</sup>Department of Biochemistry and Molecular Genetics, University of Colorado School of Medicine,  
15 Aurora, Colorado, 80045, USA.

16 <sup>5</sup>Department of Medicine, Division of Gastroenterology and Hepatology, University of Colorado  
17 Anschutz Medical Campus School of Medicine, Aurora, Colorado, 80045 USA

18

19 **\*Corresponding author and Lead Contact:** Thomas E. Morrison, Ph.D., Professor, Department  
20 of Immunology and Microbiology, University of Colorado School of Medicine, 12800 East 19th  
21 Avenue, Room P18-9128, Aurora, CO 80045. 303-724-4283 (Office). Email:  
22 thomas.morrison@cuanschutz.edu

23 **Abstract**

24           While viremia in the vertebrate host is a major determinant of arboviral reservoir  
25 competency, transmission efficiency, and disease severity, immune mechanisms that control  
26 arboviral viremia are poorly defined. Here, we identify critical roles for the scavenger receptor  
27 MARCO in controlling viremia during arthritogenic alphavirus infections in mice. Following  
28 subcutaneous inoculation, alphavirus particles drain via the lymph and are rapidly captured by  
29 MARCO<sup>+</sup> lymphatic endothelial cells (LECs) in the draining lymph node (dLN), limiting viral spread  
30 to the bloodstream. Upon reaching the bloodstream, alphavirus particles are cleared from the  
31 circulation by MARCO-expressing Kupffer cells in the liver, limiting viremia and further viral  
32 dissemination. MARCO-mediated accumulation of alphavirus particles in the dLN and liver is an  
33 important host defense mechanism as viremia and viral tissue burdens are elevated in MARCO<sup>-/-</sup>  
34 mice and disease is more severe. These findings uncover a previously unrecognized arbovirus  
35 scavenging role for LECs and improve our mechanistic understanding of viremia control during  
36 arboviral infections.

37

38 **Key Words**

39 Arbovirus / Kupffer cells / lymphatic endothelial cells / MARCO / viremia

## 40 Introduction

41 Over the last two decades we have experienced the unanticipated emergence or re-  
42 emergence of multiple arboviruses, leading to far-reaching epidemics. In 2004, chikungunya virus  
43 (CHIKV), a mosquito-borne alphavirus, re-emerged in the Indian Ocean region and has since  
44 infected millions of people in epidemics spanning the globe, including the Americas (Moro *et al*,  
45 2010; Volk *et al*, 2010; Zeller *et al*, 2016). CHIKV and closely related alphaviruses (e.g., Mayaro,  
46 o'nyong'nyong (ONNV), and Ross River (RRV) viruses) cause severe arthralgia and arthritis  
47 affecting the small joints. These debilitating symptoms can persist for months to years after  
48 infection (Borgherini *et al*, 2008; Couturier *et al*, 2012; Rodríguez-Morales *et al*, 2016; Schilte *et*  
49 *al*, 2013), and have severe economic consequences (Cardona-Ospina *et al*, 2015; Soumahoro *et*  
50 *al*, 2011; Vijayakumar *et al*, 2013). In 2007, the previously obscure Zika virus (ZIKV) caused  
51 multiple outbreaks in islands of the Pacific Ocean before spreading to the Americas in 2015 (Duffy  
52 *et al*, 2009; Metsky *et al*, 2017; Musso *et al*, 2018). This epidemic revealed an unexpected  
53 association of ZIKV with severe disease manifestations, including Guillain-Barré syndrome and  
54 congenital ZIKV syndrome (Pierson & Diamond, 2018). Because of this, in 2016 the WHO  
55 declared the ZIKV outbreak in the Americas a Public Health Emergency of International Concern.  
56 These events underscore the ongoing threat that zoonotic arboviruses pose.

57 Arboviral infections in humans are often the result of spillover from enzootic cycles, and  
58 for many arboviruses, humans are a dead-end host. However, some arboviruses sustain human-  
59 mosquito-human transmission, including dengue virus (DENV), yellow fever virus (YFV), ZIKV,  
60 and CHIKV (Weaver, 2018), which facilitates global emergence through air travel and allows for  
61 rapid spread of the virus through urban areas. While there are many determinants of arbovirus  
62 urbanization, a key factor is the development of a magnitude and duration of viremia sufficient to  
63 support infection of mosquitoes (Weaver, 2018). Beyond influencing reservoir competency and  
64 transmission efficiency, viremia also positively correlates with arboviral disease severity (Chow *et*  
65 *al*, 2011; de St Maurice *et al*, 2018; Pozo-Aguilar *et al*, 2014; Vaughn *et al*, 2000; Vuong *et al*,

66 2020; Waggoner *et al*, 2016). Thus, understanding factors that influence the magnitude and  
67 duration of viremia following arboviral infection is of critical importance.

68         Following the delivery of arboviruses via a mosquito bite, the virus replicates at the site of  
69 inoculation before spreading via the lymph to ultimately reach the bloodstream (Johnston *et al*,  
70 2000; MacDonald, 2000). Given this, arboviruses must evade immune defenses in draining lymph  
71 nodes (dLNs) to establish a primary viremia. Within the dLN, subcapsular sinus (SCS)  
72 macrophages and medullary sinus (MS) macrophages are strategically positioned to encounter  
73 lymph-borne pathogens (Bellomo *et al*, 2018). These cells have been described as molecular  
74 “flypaper” given their roles in rapidly capturing a wide range of incoming particulate antigen,  
75 including lymph-borne virions (Farrell *et al*, 2015; Junt *et al*, 2007). Moreover, viral replication  
76 within SCS macrophages initiates interferon production and facilitates recruitment and activation  
77 of immune cells to limit further viral dissemination (Iannacone *et al*, 2010; Kastenmuller *et al*,  
78 2012).

79         Upon reaching the bloodstream, virus particles must evade clearance by blood-filtering  
80 organs to maintain viremia and disseminate to distal tissues. The liver and spleen contain  
81 phagocytic cells strategically positioned to recognize and remove circulating self and non-self  
82 molecules. In the splenic marginal zone, marginal zone (MZM) and metallophilic (MMM)  
83 macrophages remove circulating apoptotic cells, antigen and microbes (Borges da Silva *et al*,  
84 2015; Lewis *et al*, 2019). In the liver, Kupffer cells (KCs), which account for 80-90% of all tissue  
85 macrophages (Bilzer *et al*, 2006), line the sinusoids to detect and clear blood-borne microbes and  
86 modified host molecules from the circulation (Hickey & Kubes, 2009; Lee *et al*, 2010; Zeng *et al*,  
87 2016).

88         In prior studies, we found that i.v. inoculated arthritogenic alphavirus virions were rapidly  
89 removed from the circulation and accumulated in the liver (Carpentier *et al*, 2019). In addition, we  
90 identified the scavenger receptor MARCO as essential for alphavirus particle clearance from the  
91 blood (Carpentier *et al.*, 2019). These findings revealed a critical host defense mechanism that

92 contributes to the control of arbovirus viremia once viral particles have reached the bloodstream.  
93 Here, using genetic approaches, confocal microscopy, and single cell mRNA sequencing (scRNA-  
94 seq) analysis of dLN cell populations, we expand these analyses to improve our mechanistic  
95 understanding of the role of MARCO during arthritogenic alphavirus infection following a more  
96 natural subcutaneous inoculation route. Our studies revealed two distinct roles for MARCO in  
97 controlling arthritogenic alphavirus dissemination in vertebrate hosts. First, MARCO<sup>+</sup> LECs in the  
98 dLN sequester CHIKV particles to delay the establishment of viremia. Once this barrier is  
99 breached, MARCO-expressing Kupffer cells in the liver provide a second layer of protection by  
100 removing circulating viral particles. These findings advance our understanding of the immune  
101 mechanisms that control arthritogenic alphavirus viremia and dissemination and reveal an  
102 arbovirus-scavenging role for LECs.

103 **Results**

104

105 **CHIKV infection outcomes are more severe in MARCO<sup>-/-</sup> mice.**

106 To further elucidate the role of MARCO during arthritogenic alphavirus infection, we  
107 inoculated four-week-old WT or MARCO<sup>-/-</sup> mice subcutaneously (s.c.) in the left rear footpad with  
108 CHIKV and evaluated disease outcomes. As a control, WT and MARCO<sup>-/-</sup> mice were inoculated  
109 with CHIKV E2 K200R, a mutant virus that evades MARCO-mediated clearance from the  
110 circulation (Carpentier *et al.*, 2019) and causes severe disease in WT mice (Hawman *et al.*, 2017).  
111 WT mice inoculated with WT CHIKV steadily gained weight (**Fig 1A**) and displayed little to no  
112 defects in gait or hind-limb gripping ability (**Fig 1B**). In contrast, and similar to previous findings  
113 (Hawman *et al.*, 2017), WT mice inoculated with CHIKV E2 K200R had delayed weight gain and  
114 developed more severe signs of musculoskeletal disease. Similarly, MARCO<sup>-/-</sup> mice infected with  
115 either WT CHIKV or CHIKV E2 K200R developed more severe disease signs (**Fig 1A and 1B**).  
116 Notably, the disease observed in MARCO<sup>-/-</sup> mice infected with CHIKV E2 K200R was not more  
117 severe than disease in MARCO<sup>-/-</sup> mice infected with WT CHIKV, suggesting that the enhanced  
118 disease caused by CHIKV E2 K200R in WT mice is due to evasion of MARCO. These findings  
119 demonstrate that the scavenger receptor MARCO protects from severe CHIKV disease.

120

121 **CHIKV viremia and tissue burdens are elevated in MARCO<sup>-/-</sup> mice**

122 Since our previous work identified a critical role for MARCO in clearing arthritogenic  
123 alphavirus particles from the circulation (Carpentier *et al.*, 2019), we evaluated the extent to which  
124 the magnitude and duration of viremia is altered in MARCO<sup>-/-</sup> mice. At 1-day post-inoculation (dpi),  
125 infectious virus in the blood of MARCO<sup>-/-</sup> mice was elevated (230-fold;  $P < 0.0001$ ) compared with  
126 WT mice (**Fig 1C**). Viremia peaked in both WT and MARCO<sup>-/-</sup> mice at 2 dpi, but peak viremia was  
127 150-fold higher in MARCO<sup>-/-</sup> mice. In addition, MARCO<sup>-/-</sup> mice maintained an elevated level of  
128 infectious virus in the serum through day five post-infection (**Fig 1C**). As neutralizing antibody can

129 mask viral particles in the circulation at later times post-infection, we also analyzed serum  
130 samples for viral genomes by RT-qPCR. This analysis revealed that while CHIKV particles were  
131 mostly cleared from the blood of WT mice by 7 dpi, they remained detectable in the blood of  
132 MARCO<sup>-/-</sup> mice (**Fig 1D**). These findings demonstrate that in the absence of MARCO both the  
133 magnitude and duration of viremia are increased.

134 We next evaluated whether the presence or absence of MARCO influences viral  
135 dissemination by quantifying viral burden in tissues proximal and distal to the inoculation site at 1  
136 dpi. CHIKV burdens were similar in the ipsilateral ankle of WT and MARCO<sup>-/-</sup> mice, suggesting  
137 that MARCO does not influence replication near the site of inoculation (**Fig 1E**). In contrast,  
138 MARCO<sup>-/-</sup> mice had 2-3 orders of magnitude more infectious virus in distal tissues compared with  
139 WT mice (contralateral ankle: 3,163-fold,  $P < 0.0001$ ; contralateral quadriceps: 951-fold,  $P <$   
140  $0.0001$ ) (**Fig 1E**). These findings were not unique to CHIKV, as infection of MARCO<sup>-/-</sup> mice with  
141 two other arthritogenic alphaviruses, ONNV and RRV, also resulted in elevated viral burdens in  
142 distal tissues and in the serum at 1 dpi compared with WT mice (**Fig 1F-G**). The elevated viral  
143 burden observed in the contralateral ankle and quadriceps of MARCO<sup>-/-</sup> mice infected with CHIKV  
144 persisted throughout the course of infection, with increased viral burden observed at days 3, 7  
145 and 14 post-infection (**Fig S1A-C**). These findings demonstrate that in the absence of MARCO,  
146 arthritogenic alphaviruses develop a much higher viremia and are better able to disseminate to  
147 distal tissues.

148

#### 149 **Kupffer cells rapidly remove CHIKV particles from the circulation.**

150 In prior studies, we found that i.v. inoculated CHIKV particles are rapidly cleared from the  
151 circulation and accumulate in the liver in a MARCO-dependent manner (Carpentier *et al.*, 2019).  
152 Moreover, depletion of phagocytic cells in the spleen and liver in contact with the blood, through  
153 i.v. administration of clodronate-loaded liposomes (CLL), prevented accumulation of CHIKV RNA  
154 in the liver (Carpentier *et al.*, 2019). These data suggest that KCs play a dominant role in the

155 removal of CHIKV particles from the circulation. Based on these data, we hypothesized that  
156 MARCO-mediated clearance of viral particles by KCs limits the magnitude and duration of viremia,  
157 thus restricting viral dissemination and pathogenicity. To test this, we evaluated the extent to  
158 which specific depletion of KCs impaired the clearance of circulating CHIKV particles. To do this,  
159 we used Clec4F-DTR mice (Scott *et al*, 2016), which express the diphtheria toxin receptor (DTR)  
160 under the control of *Clec4f*, a gene expressed exclusively in KCs. We treated WT or Clec4F-DTR<sup>+</sup>  
161 mice with DT 1-2 days prior to i.v. inoculation of CHIKV. In WT mice, CHIKV particles were rapidly  
162 cleared from the circulation by 45 min (**Fig 2A**). In contrast, Clec4F-DTR<sup>+</sup> mice had increased  
163 viral particles in the serum at this time point (77-fold;  $P < 0.0001$ ) (**Fig 2A**), demonstrating that  
164 KCs contribute to CHIKV clearance. However, the block to clearance in DT-treated Clec4F-DTR<sup>+</sup>  
165 mice was not as robust as observed in mice treated i.v. with CLL (**Fig 2B**). Given the broad effects  
166 of CLL treatment (Seiler *et al*, 1997; Van Rooijen & Sanders, 1994), we employed CD169-DTR<sup>+</sup>  
167 mice (Miyake *et al*, 2007), which allow for specific depletion of CD169<sup>+</sup> cells, including liver KCs  
168 and splenic MMM and MZM (Gupta *et al*, 2016; Miyake *et al.*, 2007). CHIKV clearance was  
169 blocked in DT-treated CD169-DTR<sup>+</sup> mice to levels similar to that observed in CLL-treated mice  
170 (**Fig 2C**). However, we found that KC depletion was much more efficient in CLL-treated WT mice  
171 and DT-treated CD169-DTR<sup>+</sup> mice compared with DT-treated Clec4F-DTR<sup>+</sup> mice, with averages  
172 of 1.25 (CLL), 2.5 (CD169-DTR<sup>+</sup>) and 11.5 (Clec4F-DTR<sup>+</sup>) F4/80<sup>+</sup> cells per field of view (**Fig 2D-**  
173 **E**). The less efficient depletion of KCs in Clec4F-DTR<sup>+</sup> mice likely accounts for the less potent  
174 block to clearance of circulating CHIKV particles. Collectively, these findings suggest that KCs  
175 are primarily responsible for the rapid removal of CHIKV from the circulation following i.v.  
176 inoculation.

177

### 178 **Depletion of KCs is not sufficient to enhance early CHIKV dissemination.**

179 We reasoned that if clearance of viral particles by MARCO-expressing KCs was  
180 responsible for the enhanced viremia and dissemination observed in MARCO<sup>-/-</sup> mice following s.c.



181 virus inoculation, depletion of KCs would also enhance CHIKV dissemination. To test this idea,  
182 we treated WT or Clec4F-DTR<sup>+</sup> mice with DT prior to s.c. inoculation of CHIKV in the left rear  
183 footpad and measured viral burden in tissues at 1 dpi. Surprisingly, unlike what we observed in  
184 MARCO<sup>-/-</sup> mice (**Fig 1E**), the amounts of CHIKV in tissues and the circulation of WT and DT-  
185 treated Clec4F-DTR<sup>+</sup> mice were indistinguishable (**Fig 3A**). Given that depletion of KCs is not  
186 complete in DT-treated Clec4F-DTR<sup>+</sup> mice (**Fig 2D-E**), we i.v. treated WT mice with PLL or CLL  
187 42 h prior to s.c. inoculation of CHIKV in the left rear footpad, as i.v. CLL treatment efficiently  
188 depletes F4/80<sup>+</sup> cells in the liver (**Fig 2D-E**). Despite this, we found that CHIKV levels in distal  
189 tissues at 1 dpi were indistinguishable among PLL- and CLL-treated mice (**Fig 3B**). However,  
190 viremia was elevated in CLL-treated mice (27-fold;  $P < 0.001$ ) (**Fig 3B**), confirming a role for  
191 phagocytic cells in limiting CHIKV viremia. These data demonstrate that while the absence of  
192 MARCO is sufficient to enhance CHIKV dissemination, depletion of KCs is not, suggesting that  
193 additional MARCO expressing cells restrict CHIKV dissemination.

194

### 195 **The draining lymph node limits arthritogenic alphavirus dissemination.**

196 Following replication at the site of inoculation, arthritogenic alphaviruses spread through  
197 the lymph to the dLN before establishing viremia and disseminating to distal tissues. Given this,  
198 we hypothesized that MARCO-expressing cells in the dLN capture CHIKV particles, delaying the  
199 establishment of viremia and limiting viral dissemination to distal tissues. To test this, we used  
200 lymphotoxin alpha deficient mice (LT $\alpha$ <sup>-/-</sup>), which developmentally lack peripheral lymph nodes (De  
201 Togni *et al*, 1994). To evaluate the relative contributions of the dLN and liver in controlling CHIKV  
202 dissemination, WT or LT $\alpha$ <sup>-/-</sup> mice were treated i.v. with PLL or CLL to deplete phagocytic cells in  
203 the liver prior to s.c. inoculation of CHIKV in the left rear footpad. At 1 dpi, the viral burden in  
204 tissues proximal and distal to the site of inoculation were quantified. In WT mice, low levels of  
205 virus were detected in distal tissues and serum of both PLL- and CLL-treated mice (**Fig 4A**). In

206 contrast, PLL-treated  $LT\alpha^{-/-}$  mice, which lack LNs but retain liver KCs, had an elevated viral burden  
207 in distal muscle (29-fold;  $P < 0.0001$ ) and joint tissue (107-fold;  $P < 0.0001$ ), and had moderately  
208 elevated viremia (10-fold;  $P < 0.0001$ ) (**Fig 4A**). Compared with PLL-treated  $LT\alpha^{-/-}$  mice,  $LT\alpha^{-/-}$   
209 mice treated with CLL, which lack both LNs and KCs, had higher viral burdens in distal muscle  
210 (4-fold;  $P < 0.05$ ) and joint tissue (7-fold;  $P < 0.0001$ ), and a highly elevated viremia (223-fold;  $P$   
211  $< 0.0001$ ) (**Fig 4A**). These findings demonstrate that the dLN functions as a major barrier to  
212 CHIKV dissemination, as in its absence viral dissemination to distal tissues is strongly increased.  
213 The modest elevation in viremia in PLL-treated  $LT\alpha^{-/-}$  mice compared with CLL-treated  $LT\alpha^{-/-}$  mice  
214 suggests that phagocytic cells in the liver remove much of the circulating virus. An important role  
215 for liver phagocytes in controlling dissemination is supported by the elevated viral burden in both  
216 distal tissues and the circulation in CLL-treated  $LT\alpha^{-/-}$  mice, which lack both LNs and KCs (**Fig**  
217 **4A**).

218 The enhanced viral dissemination observed in CLL-treated  $LT\alpha^{-/-}$  mice (**Fig 4A**) is similar  
219 to what was observed in  $MARCO^{-/-}$  mice (**Fig 1E**), suggesting that MARCO-expressing cells in  
220 the dLN sequester alphavirus particles. To explore this idea, we inoculated WT or  $MARCO^{-/-}$  mice  
221 s.c. in the footpad with WT CHIKV or CHIKV E2 K200R (mutant virus that evades MARCO). At  
222 2 hpi, a time point at which no new infectious virus has been produced, we collected the dLN and  
223 serum to evaluate the fate of the inoculated virus. In WT mice inoculated with WT CHIKV, we  
224 detected high levels of viral RNA in the dLN, while little to no virus was observed in the serum  
225 (**Fig 4B**). In contrast, WT mice inoculated with CHIKV E2 K200R and  $MARCO^{-/-}$  mice inoculated  
226 with either WT CHIKV or CHIKV E2 K200R had 7-10-fold lower levels of viral RNA in the dLN,  
227 and remarkably had 3,700-6,200-fold more virus in the serum (**Fig 4B**). Moreover, we found that  
228  $MARCO^{-/-}$  mice inoculated with RRV, a closely related arthritogenic alphavirus, also had reduced  
229 viral RNA in the dLN (5-fold;  $P < 0.001$ ) and higher levels of virus in the blood (1,790-fold;  $P <$   
230  $0.0001$ ) compared with WT mice (**Fig 4C**). Importantly,  $MARCO^{-/-}$  mice inefficiently clear

231 circulating viral particles (Carpentier *et al.*, 2019). Therefore, the increased viremia in MARCO<sup>-/-</sup>  
232 mice 2 h following s.c. virus inoculation is likely a reflection of not only reduced virus accumulation  
233 in the dLN, but also the lack of clearance of circulating virus by liver KCs.

234

### 235 **LN Macrophages are not required for CHIKV accumulation in the dLN or for limiting viral** 236 **dissemination**

237 We next sought to define the cell type(s) in the dLN that limit CHIKV dissemination. Within  
238 the LN, MARCO is reported to be expressed by MS macrophages (Elomaa *et al.*, 1995) and a  
239 subset of LECs in the medullary region (Fujimoto *et al.*, 2020; Takeda *et al.*, 2019; Walsh *et al.*,  
240 2021; Xiang *et al.*, 2020). Consistent with these data, using flow cytometry we found that MARCO  
241 was expressed specifically on MS macrophages and LECs (**Fig S2**). Previous studies found that  
242 macrophages in the dLN capture lymph-borne viruses (Farrell *et al.*, 2015; Gonzalez *et al.*, 2010;  
243 Hickman *et al.*, 2008; Junt *et al.*, 2007), and that CLL-mediated depletion of dLN macrophages  
244 decreased viral capture by the dLN and increased viremia and dissemination (Farrell *et al.*, 2015;  
245 Junt *et al.*, 2007). Given this, we hypothesized that MARCO<sup>+</sup> MS macrophages limit the  
246 dissemination of arthritogenic alphaviruses. As MS and SCS macrophages in the LN are CD169<sup>+</sup>  
247 (Gray & Cyster, 2012), we used CD169-DTR mice to deplete LN macrophages and evaluate their  
248 capacity to promote virus accumulation in the dLN and limit virus accumulation in the circulation.  
249 WT or CD169-DTR mice were treated with DT, which results in efficient depletion of CD169<sup>+</sup> cells  
250 in the dLN (**Fig 5A**). Mice were then inoculated with CHIKV s.c. in the footpad and at 2 hpi, viral  
251 RNA in the dLN and serum was quantified by RT-qPCR. Remarkably, there was no difference in  
252 the amount of viral RNA detected in the dLN of DT-treated WT or CD169-DTR<sup>+</sup> mice, and low  
253 levels of viral RNA in the blood were observed in both WT and CD169-DTR<sup>+</sup> mice (**Fig 5B**).  
254 Importantly, DT treatment of CD169-DTR mice also depletes KCs (**Fig 2D and 3E**), and thus any  
255 virus that traffics from the dLN to the blood should remain circulating and not be masked by the  
256 clearance effects of KCs. These findings suggest that macrophages in the dLN are not required

257 to sequester viral particles and limit access to the circulation. Consistent with this, CHIKV  
258 dissemination to distal tissues was not enhanced in DT-treated CD169-DTR<sup>+</sup> mice compared with  
259 WT mice (**Fig 5C**), or in mice treated with CLL both i.v. and s.c. in the footpad to deplete  
260 phagocytic cells in the liver and dLN, respectively (**Fig S3**). These findings reveal that in contrast  
261 to previous reports for other viruses (Junt *et al.*, 2007), LN macrophages are not required for  
262 clearance of arthritogenic alphavirus particles from the lymph.

263

#### 264 **CHIKV-E2-mCherry particles co-localize with MARCO<sup>+</sup> LECs in the dLN**

265         Given that medullary macrophages are not required for accumulation of arthritogenic  
266 alphavirus particles in the dLN, we next investigated the role of LECs, as recent reports identified  
267 a subset of LECs in the medullary region of the lymph node that express MARCO (Fujimoto *et*  
268 *al.*, 2020; Xiang *et al.*, 2020). Moreover, LECs have been shown to capture and archive viral  
269 antigen (Tamburini *et al.*, 2014), further supporting a potential role for LECs in capturing alphavirus  
270 particles. To determine whether viral particles colocalized with MARCO<sup>+</sup> LECs in the dLN, we  
271 used a recombinant CHIKV in which mCherry is fused to the E2 glycoprotein present in viral  
272 particles (CHIKV-E2-mCherry). Importantly, CHIKV-E2-mCherry particles were efficiently cleared  
273 from the circulation, and clearance could be blocked by pre-treatment of mice with poly(I), a class  
274 A SR inhibitor that competitively inhibits MARCO (Chen *et al.*, 2006) (**Fig S4**). CHIKV-E2-mCherry  
275 particles were inoculated s.c. into the foot and the popliteal dLN was collected at 2 hpi. Frozen  
276 LN sections were stained for Lyve1<sup>+</sup> LECs, MARCO, B220 (marking B cell follicles and revealing  
277 nodal orientation) and mCherry<sup>+</sup> CHIKV particles. As previously reported, we detected a robust  
278 MARCO<sup>+</sup> Lyve1<sup>+</sup> LEC population in both infected and uninfected WT mice that was primarily  
279 restricted to the LN medullary sinus (**Fig 6A**). Although MARCO<sup>-/-</sup> mice lacked MARCO<sup>+</sup> cells as  
280 expected, the medullary sinus remained intact with similar morphology to that of WT mice (**Fig**  
281 **6A**, middle panels). Visually, mCherry staining for CHIKV particles was most intense in Lyve1<sup>+</sup>  
282 MARCO<sup>+</sup> LECs (**Fig 6A**, far right panels). To better quantify CHIKV<sup>+</sup> cells in the LECs of WT and

283 MARCO<sup>-/-</sup> mice, we first colocalized mCherry and Lyve1<sup>+</sup> signals in the LN, detecting many double  
284 positive cells in WT but not MARCO<sup>-/-</sup> LNs (**Fig 6B-C**). Indeed, while 39.3% of Lyve1<sup>+</sup> voxels in  
285 were also mCherry<sup>+</sup> in WT LNs, only 3.0 % were mCherry<sup>+</sup> in MARCO<sup>-/-</sup> mice, consistent with the  
286 decreased accumulation of viral genomes in the dLN of MARCO<sup>-/-</sup> mice at 2 hpi (**Fig 5B**). Higher  
287 magnification images demonstrated that in WT mice, mCherry staining overlapped with both  
288 Lyve1 and MARCO staining (**Fig 6D**). In contrast, in MARCO<sup>-/-</sup> LNs, we observed only a small  
289 amount of mCherry staining in CD11b<sup>+</sup> cells, some of which co-expressed CD169 (representing  
290 medullary sinus macrophages) (**Fig 6E**). Collectively, these findings demonstrate that following  
291 s.c. inoculation, CHIKV particles are bound by medullary sinus LECs using MARCO<sup>-/-</sup>.

292

### 293 **MARCO<sup>+</sup> LECs harbor CHIKV RNA**

294 To further characterize LEC subsets that capture virus, at 24 hpi we generated single cell  
295 suspensions from the dLN for three biological replicates each of mock- and CHIKV-infected mice.  
296 We then enriched for CD45<sup>-</sup> cells (**Fig S5**) and performed scRNA-seq to identify cell populations  
297 that harbor viral RNA. Between mock- and CHIKV-infected samples, which clustered distinctly,  
298 we captured a total of 60,185 cells (**Fig 7A**). To identify the cell types represented in these  
299 samples, we used an automated approach (Fu *et al*, 2020) that classifies cells based on their  
300 correlation with reference RNA-seq data. Using published data for cell types found in the mouse  
301 LN (Heng, 2008; Malhotra *et al*, 2012; Rodda *et al*, 2018), we were able to identify large  
302 populations of endothelial cells, non-endothelial stromal cells including fibroblastic reticular cells  
303 (FRC) and perivascular cells (PvC), along with smaller populations of CD45<sup>+</sup> cells including B  
304 cells, T cells, and macrophages (**Fig 7B**). To identify endothelial cell subsets, we further divided  
305 the endothelial cells into niche-specific subpopulations using published reference data (Xiang *et*  
306 *al.*, 2020). By this method, we identified blood endothelial cells (BEC) as well as LEC subsets  
307 including MARCO<sup>+</sup>, ceiling (cLEC), floor (fLEC), valve, collecting, Ptx3, and transition zone  
308 (tzLEC) (**Fig 7C and EV6**). Cells collected from the dLN of CHIKV-infected mice contained fewer

309 LEC subsets and were mainly composed of MARCO<sup>+</sup> LECs, valve LECs, and a population of  
310 endothelial cells that we were unable to further classify (**Fig 7C**). The limited number of LEC  
311 subsets identified in CHIKV-infected samples could be due to cell death within the dLN at 24 hpi.  
312 However, one caveat to our approach is that we are using reference data from uninfected mice  
313 which could make it more challenging to accurately annotate LN cell populations during CHIKV  
314 infection.

315 To identify cell types harboring CHIKV RNA, we classified cells based on the number of  
316 viral sequence counts. As expected, we detected only background levels of CHIKV RNA  
317 (3/26,500 cells with 1 CHIKV count each) in dLN cells of mock-infected mice (**Fig S7A**), while  
318 cells collected from the dLN of CHIKV-infected mice had viral RNA sequence counts as high as  
319 >8,000 per cell (**Fig S7A**). We used k-means clustering to divide cells from each sample into  
320 CHIKV-low and CHIKV-high groups and identified a small number of cells (n = 690, 1.1%) with  
321 high amounts of CHIKV RNA (**Fig S7A**). CHIKV-high cells displayed fewer mouse mRNA counts  
322 per cell and fewer expressed mouse genes (**Fig S7B**) potentially due to inhibition of host cell  
323 transcription or cell lysis, both of which can occur in CHIKV-infected cells (Fros & Pijlman, 2016).

324 We next analyzed the cell populations containing high amounts of CHIKV RNA. CHIKV-  
325 high cells are mainly composed of MARCO<sup>+</sup> LECs (n = 231, 33%), FRCs (n = 89, 13%), BECs (n  
326 = 49, 7%), and PvCs (n = 44, 6%), along with a group of LECs that we were unable to further  
327 classify (unassigned-LEC, n = 232, 34%) (**Fig 7F**). Among the CHIKV-high cell types, we found  
328 that the unassigned-LECs and MARCO<sup>+</sup> LECs show the highest viral burden as indicated by a  
329 high fraction of CHIKV counts per cell (**Fig 7E-G**), suggesting that these are the predominant cell  
330 populations in the dLN that capture viral particles. To further investigate the role of MARCO in  
331 these interactions, we compared MARCO expression for CHIKV-low and CHIKV-high MARCO<sup>+</sup>  
332 LECs. This analysis revealed that CHIKV-high MARCO<sup>+</sup> LECs had significantly higher expression  
333 of MARCO in comparison to their CHIKV-low counterparts (**Fig 7D and 7H**). Moreover, CHIKV-  
334 low and CHIKV-high MARCO<sup>+</sup> LECs expressed little to no Mxra8, a cell entry receptor for CHIKV

335 (Zhang *et al*, 2018) (**Fig 7I**). These data further support a role for MARCO and LECs in  
336 sequestering viral particles in the dLN and limiting CHIKV dissemination.

337

### 338 **Discussion**

339 Our results reveal a critical role for the scavenger receptor MARCO in controlling  
340 arthritogenic alphavirus viremia, dissemination, and disease. Similar protective roles for MARCO  
341 have been observed during other infections. For example, MARCO<sup>-/-</sup> mice are impaired in their  
342 ability to clear *Streptococcus pneumoniae* from the nasopharynx and lungs (Arredouani *et al*, 2004;  
343 Dorrington *et al*, 2013). Moreover, MARCO enhances phagocytosis of *Mycobacterium*  
344 *tuberculosis in vitro* (Bowdish *et al*, 2009), and MARCO polymorphisms are associated with  
345 altered susceptibility to pulmonary tuberculosis (Bowdish *et al*, 2013; Lao *et al*, 2017; Ma *et al*,  
346 2011; Thuong *et al*, 2016). Finally, during influenza A virus infection in mice, MARCO suppresses  
347 early immunopathologic inflammatory responses, and accordingly, MARCO<sup>-/-</sup> mice have  
348 increased morbidity and mortality compared with WT mice (Ghosh *et al*, 2011). However, MARCO  
349 also can be exploited by pathogens. For example, herpes simplex virus 1 (HSV-1) interactions  
350 with MARCO enhance epithelial cell adsorption, and MARCO<sup>-/-</sup> mice have reduced wound sizes  
351 following s.c. HSV-1 inoculation (MacLeod *et al*, 2013).

352 Our findings identify two distinct MARCO expressing cell types that limit arthritogenic  
353 alphavirus dissemination and viremia: MARCO<sup>+</sup> LECs in the dLN and KCs in the liver. KCs are  
354 well established to play a critical role in controlling bacteremia (Jenne & Kubes, 2013; Lee *et al.*,  
355 2010) However, the role of KCs in controlling viremia is not as well characterized. We find that  
356 specific depletion of KCs using Clec4F-DTR<sup>+</sup> mice impairs CHIKV clearance from the circulation.  
357 While it remains possible that MARCO<sup>+</sup> MZM in the spleen contribute, our findings demonstrate  
358 that KCs are the major cell type involved in the efficient removal of arthritogenic alphavirus  
359 particles from the blood, expanding their surveillance function to arboviruses.

360 Despite the critical role for KCs in removing alphavirus particles from the circulation, we  
361 found that depletion of KCs had no impact on CHIKV dissemination following s.c. viral inoculation.  
362 This led us to investigate the role of MARCO<sup>+</sup> cells in the dLN in controlling CHIKV viremia and  
363 dissemination, as lymph nodes can function as barriers to pathogen dissemination (Bogoslowski  
364 & Kubes, 2018). For example, within minutes of subcutaneous inoculation, fluorescently labeled  
365 vesicular stomatitis virus (VSV) particles can be found trapped within SCS macrophages in the  
366 dLN (Junt *et al.*, 2007). This observation extends to other viruses, including adenovirus (AdV) and  
367 vaccinia virus (VV) (Hickman *et al.*, 2008; Junt *et al.*, 2007), thus lending to the description of  
368 these SCS macrophages as “molecular flypaper” in regard to their ability to capture incoming viral  
369 particles. This macrophage-mediated capture has important implications for pathogen  
370 dissemination, as depletion of macrophages in the draining lymph node via s.c. CLL  
371 administration decreased accumulation of VSV in the dLN at early times post-infection, and  
372 increased viral dissemination to the blood (Junt *et al.*, 2007). Similarly, depletion of macrophages  
373 in the dLN was shown to enhance the dissemination of murine cytomegalovirus (MCMV), West  
374 Nile virus (WNV), and *Pseudomonas aeruginosa* (*P. aeruginosa*), and facilitate CNS invasion of  
375 neurotropic VSV (Farrell *et al.*, 2015; Iannacone *et al.*, 2010; Kastenmuller *et al.*, 2012;  
376 Winkelmann *et al.*, 2014).

377 Our results demonstrate the dLN is a major barrier to arthritogenic alphavirus  
378 dissemination, but unlike prior reports of macrophage-mediated capture our findings uncover a  
379 previously unrecognized role for LECs in scavenging arboviral particles to impair dissemination.  
380 We found that CHIKV-E2-mCherry particles colocalized with MARCO<sup>+</sup> LECs in the dLN, and  
381 scRNA sequencing of dLN stromal cell populations identified MARCO<sup>+</sup> LECs as the predominant  
382 cell type harboring CHIKV RNA. Notably, CHIKV RNA levels among MARCO<sup>+</sup> LECs correlated  
383 with MARCO expression levels, with CHIKV-high cells showing higher expression of MARCO,  
384 suggesting MARCO may mediate internalization. MARCO<sup>+</sup> LECs were negative for *Mxra8*, a  
385 known arthritogenic alphavirus entry receptor (Zhang *et al.*, 2018). The genetic absence of *Mxra8*



386 in mice reduced but did not eliminate viral replication and dissemination *in vivo* (Zhang *et al*,  
387 2019), demonstrating that additional entry receptors exist. Notably, MARCO has been reported  
388 to facilitate entry of other viruses, including HSV-1, VV, and adenovirus into target cells (MacLeod  
389 *et al*, 2015; MacLeod *et al.*, 2013; Maler *et al*, 2017; Stichling *et al*, 2018).

390 The role of LECs in capturing lymph-borne viral particles likely extends beyond  
391 arthritogenic alphaviruses. While macrophages were reported to play a major role in capture of  
392 other viruses, fluorescently labeled VSV, AdV, and VV particles co-localized with LECs in the  
393 medullary region of the dLN (Junt *et al.*, 2007; Reynoso *et al*, 2019), which is where MARCO<sup>+</sup>  
394 LECs reside. Future investigations are needed to understand whether MARCO is responsible for  
395 broadly mediating capture of diverse viruses by LECs, or whether other pattern recognition  
396 receptors (PRRs) are also involved. LECs express a wide range of PRRs, including toll-like  
397 receptors, Fc receptors, C-type lectin receptors, and additional scavenger receptors, suggesting  
398 they may have multiple mechanisms for scavenging diverse viral particles (Berendam *et al*, 2019;  
399 Jalkanen & Salmi, 2020).

400 Additional work is also needed to better understand the consequences of viral capture by  
401 LECs. Our findings suggest that capture of arthritogenic alphaviruses by MARCO<sup>+</sup> LECs  
402 contributes to the control of viral dissemination. However, whether LECs become productively  
403 infected by arthritogenic alphaviruses remains under investigation. In prior studies, we were  
404 unable to detect fluorescent signal in the dLN following s.c. inoculation with a recombinant CHIKV  
405 expressing the fluorescent protein mKate (McCarthy *et al*, 2018). However, our scRNA-seq  
406 results reveal that only a small fraction of stromal cells in the dLN harbor CHIKV RNA, suggesting  
407 flow cytometry may not be sensitive enough to detect whether the virus is productively replicating  
408 in these cells. Our scRNA-seq analysis provides hints that the MARCO<sup>+</sup> LECs may be actively  
409 infected. For example, cells harboring CHIKV RNA have high viral reads, suggestive of genome  
410 replication, and CHIKV-high cells have reduced reads for mouse genes, which is consistent with  
411 virus-mediated transcriptional shutoff (Fros & Pijlman, 2016). Further studies are needed, but

412 these findings raise the possibility that MARCO facilitates arthritogenic alphavirus entry and  
413 infection of distinct cell types, such as MARCO<sup>+</sup> LECs.

414 LEC-mediated capture of viral particles also could influence innate and adaptive immune  
415 responses. LECs have been reported to archive viral antigen for weeks following the resolution  
416 of the adaptive immune response (Kedl *et al.*, 2017; Tamburini *et al.*, 2014), and our findings may  
417 provide insight as to how these antigens are initially acquired by LECs. This archived antigen can  
418 be either directly presented or exchanged with dendritic cells to allow for cross-presentation to  
419 CD8<sup>+</sup> T-cells to stimulate memory T cells and augment protective immunity (Kedl *et al.*, 2017;  
420 Tamburini *et al.*, 2014; Vokali *et al.*, 2020). In other studies evaluating factors that influence  
421 alphavirus viremia and dissemination, injection of Semliki Forest virus, a closely related  
422 alphavirus, at the site of a mosquito bite in the skin of mice was found to delay viral spread to the  
423 lymph node, which ultimately enhanced early viremia and viral dissemination, and led to more  
424 severe disease outcomes (Pingen *et al.*, 2016). It is possible that the retention of viral particles at  
425 the site of inoculation allows the virus to replicate to high titers before initiating potent immune  
426 responses due to viral capture in the dLN. Future studies are necessary to better understand how  
427 MARCO<sup>+</sup> LEC-mediated capture of arthritogenic alphaviruses influences downstream innate and  
428 adaptive immune responses.

429 In summary, our results reveal a critical scavenging role for MARCO during arthritogenic  
430 alphavirus infection. We find that following s.c. inoculation, alphavirus particles accumulate in the  
431 dLN in association with MARCO<sup>+</sup> LECs, limiting viral spread to the blood. Once reaching the  
432 blood, liver KCs provide a second line of defense and rapidly clear circulating alphavirus particles  
433 in a MARCO-dependent manner. Collectively, these findings advance our mechanistic  
434 understanding of how viremia is controlled during arboviral infections, which has several important  
435 implications for arboviral biology. First, viremia has been shown to positively correlate with  
436 disease severity following infection with CHIKV and other arboviruses (Chow *et al.*, 2011; de St  
437 Maurice *et al.*, 2018; Pozo-Aguilar *et al.*, 2014; Vaughn *et al.*, 2000; Vuong *et al.*, 2020; Waggoner

438 *et al.*, 2016). Consistent with this, we find that the high magnitude and duration of viremia  
439 observed in CHIKV-infected MARCO<sup>-/-</sup> mice promoted more rapid viral dissemination, increased  
440 viral tissue burdens, and resulted in more severe disease signs. These findings raise the possibility  
441 that MARCO also influences disease severity in humans. The MARCO gene is highly polymorphic  
442 in humans and mice (Bowdish & Gordon, 2009), and this genetic variation has been demonstrated  
443 to influence human susceptibility to tuberculosis and respiratory syncytial virus (Bowdish *et al.*,  
444 2013; High *et al.*, 2016; Lao *et al.*, 2017; Ma *et al.*, 2011; Thuong *et al.*, 2016). Given our findings,  
445 it is possible that MARCO polymorphisms similarly influence disease severity following  
446 arthritogenic alphavirus infection. In addition to influencing disease severity, MARCO-virus  
447 interactions likely also affect virus transmission efficiency and reservoir host competency in  
448 nature, as the magnitude and duration of viremia is an important factor dictating which vertebrate  
449 species can serve as reservoirs for arboviruses (Weaver, 2018). Thus, differences in MARCO  
450 alleles may influence which vertebrate hosts participate in arthritogenic alphavirus transmission  
451 cycles. While humans are dead-end hosts for most arboviruses, a select few including CHIKV,  
452 DENV, and ZIKV generate a sufficiently high level of viremia to facilitate human-mosquito-human  
453 transmission cycles (Weaver, 2018). These viruses pose a high risk for emergence and re-  
454 emergence, as evidenced by the now global distribution of DENV and the recent ZIKV and DENV  
455 epidemics. This underscores the need for an improved understanding of viremic control.  
456 Collectively, our findings shed light on the mechanistic control of viremia during arboviral  
457 infections, and more broadly advance our understanding of how the lymph node restricts virus  
458 dissemination.

459

## 460 **Materials and Methods**

461

462 **Ethics Statement.** This study was performed in strict accordance with the  
463 recommendations in the Guide for the Care and Use of Laboratory Animals of the National

464 Institutes of Health. All of the animals were handled according to approved institutional animal  
465 care and use committee (IACUC) protocols (#00026) of the University of Colorado School of  
466 Medicine (Assurance Number A3269-01). Experimental animals were humanely euthanized at  
467 defined endpoints by exposure to isoflurane vapors followed by thoracotomy.

468

469 **Cells.** Vero cells (ATCC CCL81) were cultured at 37°C in Dulbecco's Modified Eagle  
470 medium (DMEM)-F-12 (Gibco) supplemented with 10% fetal bovine serum, 1x nonessential  
471 amino acids (Life Technologies), and 1X penicillin-streptomycin. BHK-21 cells (ATCC CCL10)  
472 were cultured at 37°C in  $\alpha$ -minimum essential medium (Gibco) supplemented with 10% FBS,  
473 10% tryptone phosphate broth, and penicillin-streptomycin.

474

475 **Viruses.** The CHIKV strain used in these studies is AF15561, an Asian genotype strain  
476 isolated from a human patient in Thailand (GenBank accession no. EF452493). cDNA clones of  
477 AF15561 and AF15561 E2 K200R have been described previously (Hawman *et al.*, 2017). The  
478 recombinant CHIKV AF15561 cDNA clone encoding mCherry-tagged E2 glycoprotein was  
479 derived from a 181/25 CHIKV E2 mCherry-tagged cDNA clone kindly provided by Richard Kuhn  
480 (Purdue University). Site-directed mutagenesis was first used to revert positions E2 12 and E2 84  
481 from attenuated 181/25 to WT AF15561 using the following primers: CHIKV-181/25 E2 I12T FOR  
482 (5'-gtgagctaggtacggctctgtggcttatagacattgaa-3'), CHIKV-181/25 E2 I12T REV (5'-  
483 ttcaatgtctataaagccacaagaccgtacctagctcac-3'), CHIKV 181/25 E2 R82G FOR (5'-  
484 gttcttacaatagcccggcctctctgcgctc-3') and CHIKV 181/25 R82G Rev (5'-  
485 gacgcagagagggccgggctatttgaagaac-3'). A fragment containing part of capsid, mCherry, and part  
486 of E2 was then subcloned into an AF15561 cDNA clone using restriction sites XhoI and XmaI. To  
487 generate virus stocks, linearized cDNA clones were *in vitro* transcribed with SP6 RNA  
488 polymerase, and viral RNA was electroporated into BHK-21 cells as described previously

489 (Ashbrook *et al*, 2014). At 24-28 h post-electroporation, clarified supernatant containing infectious  
490 virus was collected, aliquoted and stored at -80°C. The RRV strain used is SN11 (Liu *et al*, 2011),  
491 a clinical isolate (kindly provided by John Aaskov, Queensland University of Technology) that was  
492 passaged 1X on C6/36 cells before we propagated the stock used in these studies in BHK-21  
493 cells. ONNV SG650 (Lanciotti, 1998), a strain isolated from human sera in Uganda in 1996, was  
494 derived from a cDNA clone ((Vanlandingham, 2006); provided by Stephen Higgs, Kansas State  
495 University) through electroporation into BHK-21 cells, and propagated on BHK-21 cells for one  
496 passage to increase titer. Infectious virus was titered by plaque assay on BHK-21 cells. To  
497 quantify viral genomes, viral stocks were treated with RNase1 at 37°C for 1 h. RNA was extracted  
498 and viral genomes were quantified by RT-qPCR.

499

500 **Mouse Experiments.** WT C57BL/6 and congenic Lymphotoxin alpha<sup>-/-</sup> (LTα<sup>-/-</sup>) mice (De  
501 Togni *et al.*, 1994) were obtained from the Jackson Laboratory. Congenic CD169-DTR<sup>+</sup> (Miyake  
502 *et al.*, 2007) mice were provided by Jason Cyster (University of California San Francisco) and  
503 congenic MARCO<sup>-/-</sup> mice (Arredouani *et al.*, 2004) were provided by Dawn Bowdish (McMaster  
504 University). Clec4F-DTR<sup>+</sup> C57BL/6 mice (Scott *et al.*, 2016) were provided by Martin Guilliams  
505 (Ghent University). CD169-DTR<sup>+</sup>, MARCO<sup>-/-</sup>, LTα<sup>-/-</sup> and Clec4F-DTR<sup>+</sup> mice were housed and bred  
506 at the University of Colorado School of Medicine under specific pathogen-free conditions and  
507 were distributed randomly into groups containing approximately even division of sexes for  
508 experiments. WT male mice were purchased commercially and were age matched and distributed  
509 randomly across groups. Mice 4 weeks of age were used in all experiments. All mouse  
510 experiments were performed under animal biosafety level 2 or 3 conditions, as appropriate.

511 For experiments involving Clec4F-DTR<sup>+</sup> mice, mice were treated with 50 ng of DT either  
512 i.v. or i.p. as indicated in the Figure legend, 48 h and 24 h prior to virus inoculation. For  
513 experiments involving CD169-DTR<sup>+</sup> mice, mice were injected with 100 ng of DT i.p. 48 h and 24

514 h prior to virus inoculation. For experiments involving depletion of liver and splenic phagocytes,  
515 mice were inoculated i.v. with 100  $\mu$ l per 10 g of body weight of PBS- (PLL) or clodronate-loaded  
516 liposomes (CLL) (clodronateliposomes.org) 42 h prior to virus inoculation. To deplete phagocytic  
517 cells in the draining lymph node, mice were inoculated s.c. in the left-rear footpad with 20  $\mu$ l of  
518 PLL or CLL 24 h prior to virus inoculation.

519 In experiments evaluating disease or viral tissue burdens, mice were anesthetized with  
520 isoflurane vapors and inoculated in the left-rear footpad with a 10  $\mu$ l volume containing  $10^3$  PFU  
521 of virus diluted in PBS/1% FBS. Mice were weighed daily and disease scores were assigned as  
522 described previously (Jupille *et al*, 2011). In brief, the following criteria were used: score of 1: mild  
523 deficit in hind paw gripping of injected foot; score of 2: mild deficit in bilateral hind-paw gripping;  
524 score of 3: bilateral loss of gripping ability; score of 4: bilateral loss of griping ability, moderate  
525 bilateral hind-limb paresis, altered gait, difficulty righting self; score of 5: bilateral loss of gripping  
526 ability, severe bilateral hind-limb paresis, altered gait, inability to right self; score of 6: moribund  
527 state. At experiment termination, mice were euthanized by exposure to isoflurane vapors followed  
528 by bilateral thoracotomy. Blood was collected, mice were perfused with 5-10 mL of 1X PBS or 4%  
529 paraformaldehyde (PFA) (for experiments involving histology), and indicated tissues were  
530 harvested in *in vitro* diluent (1X PBS with 1% FBS and 1x  $Ca^{2+}Mg^{2+}$ ) for analysis of infectious virus  
531 by focus formation assay (FFA) or plaque assay, or in TRIzol reagent (Life Technologies) for RNA  
532 isolation and quantification of viral genomes by RT-qPCR. Tissues were homogenized using a  
533 MagNA Lyser instrument (Roche).

534 For serum clearance experiments, mice were anesthetized with isoflurane vapors and  
535 inoculated i.v. with  $10^8$  genomes of CHIKV diluted in 100  $\mu$ l of PBS/1% FBS. At 45 min post  
536 inoculation, mice were sacrificed and serum was collected. For lymph node accumulation  
537 experiments, mice were anesthetized with isoflurane vapors and inoculated s.c. in the left-rear

538 footpad with a 10  $\mu$ l volume containing  $5 \times 10^4$  PFU of virus. At 2 hpi, blood and the draining pLN  
539 were collected in TRIzol.

540

541 **Viral Genome Quantification by RT-qPCR.** To quantify viral genomes, RNA was  
542 extracted from 20  $\mu$ l of serum or from homogenized tissues in TRIzol reagent using the PureLink  
543 RNA mini kit (Life Technologies). CHIKV cDNA was generated from 10  $\mu$ l of serum derived RNA  
544 or 1  $\mu$ g of tissue derived RNA using random primers (Invitrogen) with SuperScript IV reverse  
545 transcriptase (Life Technologies). CHIKV genome copies were quantified by RT-qPCR using a  
546 CHIKV specific forward primer (5'-TTTGCGTGCCACTCTGG-3') and reverse primer (5'-  
547 CGGGTCACCACAAAGTACAA-3') with an internal TaqMan probe (5'-  
548 ACTTGCTTTGATCGCCTTGGTGAGA-3'), as previously described (Hawman *et al*, 2013). RRV  
549 cDNA was generated from 10  $\mu$ l of serum derived RNA or 1  $\mu$ g of tissue derived RNA using a  
550 sequence-tagged (indicated with lower case letters) RRV-specific RT primer (5'-  
551 ggcagtatcgtgaattcgtgcAACACTCCCGTGCACAACAGA-3') with SuperScript IV reverse tran-  
552 scriptase (Life Technologies). RRV genomes were quantified by RT-qPCR using a tag sequence-  
553 specific reverse primer (5'-GGCAGTATCGTGAATTCGATGC-3') with a RRV sequence-specific  
554 forward primer (5'-CCGTGGCGGGTATTATCAAT-3') and an internal TaqMan probe (5'-  
555 ATTAAGAGTG TAGCCATCC-3'), as previously described (Stoermer *et al*, 2012).

556

557 **Plaque Assay and Focus Formation Assay.** To quantify infectious virus, a plaque assay  
558 or focus formation assay (FFA) were used as previously described (Hawman *et al.*, 2017). For  
559 plaque assays, samples were serially diluted 10-fold in 1X PBS + 2% FBS + 1X  $\text{Ca}^{2+}\text{Mg}^{2+}$  and  
560 absorbed to BHK-21 cells in a 6-well plate for 1 h, after which cells were overlaid with 1%  
561 immunodifusion agarose (MP Biomedical). After incubation at 37°C for 40-44 h, cells were stained  
562 with neutral red stain and plaques were counted. For the FFA, serum or tissue homogenate were

563 serially diluted 10-fold in 1X PBS+ 2% FBS+ 1X Ca<sup>2+</sup>Mg<sup>2+</sup> and adsorbed to Vero cells in a 96-well  
564 plate for 2 h. Cells were then overlaid with 0.5% methylcellulose in MEM-alpha + 10% FBS and  
565 incubated at 37°C for 18 h. Following fixation with 1% PFA, cells were probed with CHK-11  
566 monoclonal antibody (Pal *et al*, 2013) at 500 ng/ml diluted in Perm Wash (1x PBS, 0.1% saponin,  
567 0.1% BSA), followed by a secondary goat anti-mouse IgG conjugated to horseradish peroxidase  
568 at 1:2,000 in Perm Wash. Foci were visualized with TrueBlue substrate (Fisher) and counted with  
569 a CTL Biospot analyzer using Biospot software (Cellular Technology).

570

571 **Immunohistochemistry.** To evaluate KC depletion in the livers of DT-treated WT,  
572 Clec4F-DTR<sup>+</sup>, and CD169-DTR<sup>+</sup> mice and PLL- or CLL-treated WT mice, at the time of harvest  
573 mice were perfused with 4% PFA and livers were harvested and fixed in 4% PFA for 24 h. Livers  
574 were paraffin-embedded and immunohistochemistry was performed on 5-micrometer sections  
575 using F4/80 antibody clone Cl:A3-1 (BioRad Cat. No. MCA497) and the VECTASTAIN Elite ABS  
576 HRP kit (Vector Laboratories, PK-6100) as previously described (Carpentier *et al.*, 2019). To  
577 quantify the efficiency of KC depletion, F4/80<sup>+</sup> cells were counted from 10 randomly selected high-  
578 power fields (HPF; 40X) for each stained liver section, and were used to calculate the average  
579 number of F4/80<sup>+</sup> cells per HPF of view.

580

581 **Isolation of cells from lymph nodes and flow cytometry.** To evaluate MARCO  
582 expressing cells in lymphoid tissue, popliteal and inguinal lymph nodes were pooled from WT or  
583 MARCO<sup>-/-</sup> mice. Lymph nodes were minced with a 22-gage needle in 1 mL of digestion media  
584 (EHAA with 0.25 mg/mL Liberase DL and 17 µg/mL DNase) and incubated at 37°C for 1 h, after  
585 which an equal volume of dissociation buffer (0.1M EDTA in EHAA) was added and incubated at  
586 37°C for 5 min. Cells were passed through a 100 µm cell strainer (BD Falcon). Single-cell  
587 suspensions were incubated for 20 min at 4°C with anti-mouse FcγRIII/II (2.4G2; BD



588 Pharmingen) prior to staining for 1 h at 4°C with the following antibodies from BioLegend (most  
589 or Novus Biologicals (MARCO) diluted in FACS buffer (PBS with 2% FBS): anti-CD45 ( 30-F11),  
590 anti-PDPN (8.1.1), anti-CD31 (390), anti-CD169 (3D6.112), anti-CD11c (BV510), anti-CD11b  
591 (M1.70), anti-B220 (RA3-6B2), anti-TCR $\beta$  (H57-597), anti-F4/80 (BM8), anti-NK1.1 (PL136) and  
592 anti-MARCO (2359A). Cells were fixed overnight in 1 $\times$  PBS/1% paraformaldehyde (PFA) and  
593 analyzed on a BD LSR Fortessa cytometer using FACSDiva software. Further analysis was  
594 performed using FlowJo software (Tree Star).

595

596 **Immunofluorescence and confocal microscopy.** Lymph nodes were fixed in 1 mL of  
597 phosphate buffer containing 0.1 M L-lysine, 2% PFA, and 2.1 mg/mL NaIO<sub>4</sub> at pH 7.4 for 24 h at  
598 4°C, followed by incubation in 30% sucrose phosphate-buffered solution for 48 h, then in 30%  
599 sucrose/PBS for 24 hr. LNs were then embedded in optimal-cutting-temperature medium  
600 (Electron Microscopy Sciences) and frozen in dry-ice-cooled isopentane. Eighteen- $\mu$ m sections  
601 were cut on a Leica cryostat (Leica Microsystems). Sections were blocked with 5% goat, donkey,  
602 bovine, rat or rabbit serum and then stained with one or more of the following: B220 (clone RA3-  
603 6B2, ThermoFisher), Lyve-1 (clone ALY7, ThermoFisher), CD169 (clone 3D6.112, BioLegend)  
604 MARCO (clone ED31, BioRad), CD11b (clone M1/70, BioLegend) and mCherry (polyclonal,  
605 Novus Bio, Cat# NBP2-25157). Images were acquired using identical photomultiplier tube (PMT)  
606 and laser power settings on a Leica Stellaris confocal microscope (Leica). Confocal microscopy  
607 images were collected over the entire popliteal lymph node (representing approximately a 7 mm<sup>2</sup>  
608 imaged area) and individual fields (tiles) were merged into a single image file. Images were  
609 analyzed using Imaris v9.02 software (Oxford Instruments). Colocalization of Lyve1 and mCherry  
610 was performed using the Coloc module of Imaris (Oxford Instruments) and % of colocalized  
611 (double positive) voxels quantitated by the program using the same settings for each LN.

612

613           **Preparation of single-cell suspensions for single-cell mRNA sequencing.** The  
614 draining popliteal lymph node from mock- or CHIKV-inoculated mice were pooled into individual  
615 replicates (3 replicates; LNs from 5 mice pooled per replicate). Lymph nodes were mechanically  
616 homogenized using a 22G needle in Click's medium (Irvine Scientific, 9195) supplemented with  
617 5 mg/mL liberase DL (Roche, 05401160001) and 2.5 mg/mL DNase (Roche 10104159001) for 1  
618 h at 37°C. After incubation, digested tissues were clarified by passing through a 100 µm cell  
619 strainer. Cell suspensions were enriched for CD45<sup>-</sup> cells by labeling cells with PE-conjugated anti-  
620 mouse CD45 (30-F11), CD140A (APA5), and Ter119 (Ter119) monoclonal antibodies and  
621 subsequent depletion of PE-labeled cells using Miltenyi anti-PE microbeads (130-048-801) and  
622 Miltenyi MACS LS (130-042-401) columns according to the manufacturer's instructions with the  
623 following modifications: (1) we used 25% of the recommended volume of anti-PE microbeads and  
624 (2) we subjected the CD45<sup>-</sup> enriched cell fraction to a second MACS LS column. All cell  
625 suspensions post-column enrichment were enumerated using a hemacytometer. Cell fractions  
626 throughout the procedure were analyzed for PE-labeled cell depletion and enrichment of CD45<sup>-</sup>  
627 cells by flow cytometry. Cell fractions were stained with fixable LIVE/DEAD dye (Invitrogen,  
628 L34955) and antibodies against the following cell surface antigens: CD45 (30-F11), CD31 (390),  
629 PDPN (8.1.1), B220 (RA3-6B2), TCRβ (H57-597), CD11b (M1/70), and Ly6C (HK1.4). All flow  
630 cytometry antibodies from obtained from BioLegend, BD Bioscience or eBioscience. Following  
631 surface antigen staining, cells were washed, fixed in 1%PFA/1%FBS, and data was acquired on  
632 a BD LSR Fortessa X-20 flow cytometer. Data analysis was performed using FlowJo analysis  
633 software (Tree Star).

634

635           **Single-cell library preparation using the 10x Genomics platform.** Lymph node cell  
636 suspensions enriched for CD45<sup>-</sup> cells were subject to single-cell droplet-encapsulation using the  
637 Next GEM Chip G Kit (1000127) and a 10x Genomics chromium controller housed in our BSL3  
638 laboratory. We targeted recovery of 10,000 cells for single-cell RNA sequencing for each

639 replicate. Single-cell gene expression libraries were generated using the Next GEM single-cell 3'  
640 GEM library and gel bead kit v3.1 (1000128) and single index kit T set A (1000213) according to  
641 the manufacturer's instructions (10x Genomics). Sequences were generated with the Illumina  
642 NovaSEQ 6000 instrument using S4 flow cells and 300 cycle SBS reagents. We targeted 50,000  
643 reads per cell, with sequencing parameters of Read 1:151 cycles; i7 index: 10 cycles; i5 index: 0  
644 cycles; Read 2: 151 cycles.

645

646 **Transcriptome and oligonucleotide detection and analysis.** FASTQ files for each  
647 replicate (3 mock, 3 CHIKV-infected) were processed using the cellranger count pipeline (v5.0.1).  
648 Reads were aligned to the mm10 and CHIKV AF15561 (EF452493.1) reference genomes.  
649 Analysis of gene expression data was performed using the Seurat R package (v4.0.0). Gene  
650 expression data for each biological replicate were combined into a single Seurat object. CHIKV  
651 counts were included as a separate "assay" in the Seurat object so they would not influence  
652 downstream processing (dimensionality reduction, clustering) of the mouse gene expression  
653 data.

654 CHIKV-low and -high cells were identified by first filtering cells to only include those with  
655 >5 CHIKV counts. K-means clustering was then used to independently group each biological  
656 replicate into CHIKV-low and -high populations (Walsh *et al.*, 2021). Cells with 5 CHIKV counts  
657 or less were included in the CHIKV-low population. Cells were filtered based on the number of  
658 detected mouse genes (>250 and <6000) and the percent mitochondrial counts (<20%). Genes  
659 were filtered to only include those detected in >5 cells. Potential cell doublets were removed using  
660 the DoubletFinder (v2.0.3) R package using an estimated doublet rate of 10%. Due to the ability  
661 of CHIKV to inhibit host transcription (Fig. S8), CHIKV-high cells with a low number of detected  
662 mouse genes (<250) or a high fraction of mitochondrial reads (>20%) were not filtered and  
663 remained in the dataset for the downstream analysis. The fraction of CHIKV counts was  
664 calculated by dividing the number of CHIKV counts by the total number of counts for each cell.

665 Mouse gene expression counts were normalized by the total mouse counts for the cell, multiplied  
666 by a scale factor (10,000), and log-transformed (NormalizeData), Normalized mouse counts were  
667 scaled and centered (ScaleData) using the top 2000 variable features (FindVariableFeatures).  
668 The scaled data were used for PCA (RunPCA) and the first 40 principal components were used  
669 to find clusters (FindNeighbors, FindClusters) and calculate uniform manifold approximation and  
670 projection (UMAP) (RunUMAP).

671 B cells and T cells were identified based on CD19 and CD3 expression, respectively. The  
672 remaining cell types were annotated using the R package clustifyr  
673 (<https://rnabioco.github.io/clustifyr>) with published reference RNA-seq data (Heng, 2008;  
674 Malhotra *et al.*, 2012; Rodda *et al.*, 2018) available for download through the clustifyrdata R  
675 package, <https://rnabioco.github.io/clustifyrdata>). Endothelial cells were further classified using  
676 reference data for mouse LEC subsets (Xiang *et al.*, 2020).

677

678 **Statistical Analysis.** Appropriate experimental sample sizes were determined using a  
679 power calculation (80% power, 0.05 type I error) to detect a 4-5-fold effect in pre-existing sample  
680 sets. Each Figure legend defines the biological replicates of individual mice (N) and the number  
681 of experiments performed. Data are represented as mean  $\pm$  SD or mean  $\pm$  SEM, as indicated.  
682 The statistical tests conducted on each data set are indicated in the Figure legend and were  
683 performed using GraphPad Prism 8.0. Two-sided t-tests (parametric) or Mann Whitney tests  
684 (nonparametric) were used to compare two groups. One-way ANOVA with Bonferroni's multiple  
685 comparison test (parametric) or Kruskal-Wallis with Dunn's multiple comparisons test  
686 (nonparametric) were used to compare three or more groups, and two-way ANOVA with  
687 Bonferroni's multiple comparison test was used to compare two groups at multiple time points.

688

689

690 **Acknowledgements**

691 This work was supported by Public Health Service grants R01 AI148144 and R01 AI141436 to  
692 T.E.M., F32 AI140567 to K.S.C., F32 AI122463 to M.K.M., T32 AI007405 to K.S.C., T32 AI074491  
693 to R.M.S, and R35 GM119550 and R01 AG071467 to J.R.H.. H.D.H. is supported by the  
694 Intramural Research Program of NIAID, NIH (<https://www.niaid.nih.gov/>) and R.M.S is supported  
695 by the RNA Bioscience Initiative. The funders had no role in study design, data collection and  
696 analysis, decision to publish, or preparation of the manuscript.

697

### 698 **Author Contributions**

699 K.S.C., E.D.L., B.A.J.T., J.R.H., H.D.H., and T.E.M. designed the experiments. K.S.C., B.J.D.,  
700 M.K.M., N.A.M., C.J.L., F.S.L., and G.V.R. performed the experiments. K.S.C., R.M.S., M.K.M.,  
701 G.V.R., H.D.H., and T.E.M. performed the data analysis. K.S.C., R.M.S., and T.E.M. wrote the  
702 initial draft of the manuscript, with the other authors providing comments and edits to the final  
703 version.

704

### 705 **Declaration of Interests**

706 The authors declare no competing interests

707

### 708 **References**

709

710 Arredouani M, Yang Z, Ning Y, Qin G, Soininen R, Tryggvason K, Kobzik L (2004) The scavenger  
711 receptor MARCO is required for lung defense against pneumococcal pneumonia and inhaled  
712 particles. *The Journal of experimental medicine* 200: 267-272

713 Ashbrook AW, Burrack KS, Silva LA, Montgomery SA, Heise MT, Morrison TE, Dermody TS  
714 (2014) Residue 82 of the Chikungunya virus E2 attachment protein modulates viral dissemination  
715 and arthritis in mice. *Journal of Virology* 88: 12180-12192

716 Bellomo A, Gentek R, Bajenoff M, Baratin M (2018) Lymph node macrophages: Scavengers,  
717 immune sentinels and trophic effectors. *Cell Immunol* 330: 168-174

718 Berendam SJ, Koeppel AF, Godfrey NR, Rouhani SJ, Woods AN, Rodriguez AB, Peske JD,  
719 Cummings KL, Turner SD, Engelhard VH (2019) Comparative Transcriptomic Analysis Identifies  
720 a Range of Immunologically Related Functional Elaborations of Lymph Node Associated  
721 Lymphatic and Blood Endothelial Cells. *Front Immunol* 10: 816

722 Bilzer M, Roggel F, Gerbes AL (2006) Role of Kupffer cells in host defense and liver disease.  
723 *Liver Int* 26: 1175-1186

724 Bogoslawski A, Kubes P (2018) Lymph Nodes: The Unrecognized Barrier against Pathogens.  
725 *ACS Infect Dis* 4: 1158-1161

726 Borges da Silva H, Fonseca R, Pereira RM, Cassado AdA, Álvarez JM, D'Império Lima MR (2015)  
727 Splenic Macrophage Subsets and Their Function during Blood-Borne Infections. *Frontiers in*  
728 *Immunology* 6: 480

729 Borgherini G, Poubeau P, Jossaume A, Gouix A, Cotte L, Michault A, Arvin Berod C, Paganin F  
730 (2008) Persistent arthralgia associated with chikungunya virus: a study of 88 adult patients on  
731 reunion island. *Clinical Infectious Diseases* 47: 469-475

732 Bowdish DM, Sakamoto K, Kim MJ, Kroos M, Mukhopadhyay S, Leifer CA, Tryggvason K, Gordon  
733 S, Russell DG (2009) MARCO, TLR2, and CD14 are required for macrophage cytokine responses  
734 to mycobacterial trehalose dimycolate and Mycobacterium tuberculosis. *PLoS Pathog* 5:  
735 e1000474

736 Bowdish DM, Sakamoto K, Lack NA, Hill PC, Sirugo G, Newport MJ, Gordon S, Hill AV, Vannberg  
737 FO (2013) Genetic variants of MARCO are associated with susceptibility to pulmonary  
738 tuberculosis in a Gambian population. *BMC medical genetics* 14: 47

739 Bowdish DME, Gordon S (2009) Conserved domains of the class A scavenger receptors:  
740 evolution and function. *Immunological reviews* 227: 19-31

741 Cardona-Ospina JA, Villamil-Gómez WE, Jimenez-Canizales CE, Castañeda-Hernández DM,  
742 Rodríguez-Morales AJ (2015) Estimating the burden of disease and the economic cost  
743 attributable to chikungunya, Colombia, 2014. *Transactions of The Royal Society of Tropical*  
744 *Medicine and Hygiene* 109: 793-802

745 Carpentier KS, Davenport BJ, Haist KC, McCarthy MK, May NA, Robison A, Ruckert C, Ebel GD,  
746 Morrison TE (2019) Discrete viral E2 lysine residues and scavenger receptor MARCO are  
747 required for clearance of circulating alphaviruses. *Elife* 8

748 Chen Y, Sankala M, Ojala JRM, Sun Y, Tuuttila A, Isenman DE, Tryggvason K, Pikkarainen T  
749 (2006) A phage display screen and binding studies with acetylated low density lipoprotein provide  
750 evidence for the importance of the scavenger receptor cysteine-rich (SRCR) domain in the ligand-  
751 binding function of MARCO. *The Journal of biological chemistry* 281: 12767-12775

752 Chow A, Her Z, Ong EKS, Chen J-m, Dimatatac F, Kwek DJC, Barkham T, Yang H, Rénia L, Leo  
753 YS *et al* (2011) Persistent arthralgia induced by Chikungunya virus infection is associated with  
754 interleukin-6 and granulocyte macrophage colony-stimulating factor. *Journal of Infectious*  
755 *Diseases* 203: 149-157

756 Couturier E, Guillemin F, Mura M, Léon L, Virion J-M, Letort M-J, De Valk H, Simon F, Vaillant V  
757 (2012) Impaired quality of life after chikungunya virus infection: a 2-year follow-up study.  
758 *Rheumatology (Oxford, England)* 51: 1315-1322

759 de St Maurice A, Harmon J, Nyakarahuka L, Balinandi S, Tumusiime A, Kyondo J, Mulei S,  
760 Namutebi A, Knust B, Shoemaker T *et al* (2018) Rift valley fever viral load correlates with the  
761 human inflammatory response and coagulation pathway abnormalities in humans with  
762 hemorrhagic manifestations. *PLOS Neglected Tropical Diseases* 12: e0006460

763 De Togni P, Goellner J, Ruddle NH, Streeter PR, Fick A, Mariathasan S, Smith SC, Carlson R,  
764 Shornick LP, Strauss-Schoenberger J *et al* (1994) Abnormal Development of Peripheral  
765 Lymphoid Organs in Mice Deficient in Lymphotoxin *Science* 264: 703-707

766 Dorrington MG, Roche AM, Chauvin SE, Tu Z, Mossman KL, Weiser JN, Bowdish DM (2013)  
767 MARCO is required for TLR2- and Nod2-mediated responses to *Streptococcus pneumoniae* and  
768 clearance of pneumococcal colonization in the murine nasopharynx. *J Immunol* 190: 250-258  
769 Duffy MR, Chen T-H, Hancock WT, Powers AM, Kool JL, Lanciotti RS, Pretrick M, Marfel M,  
770 Holzbauer S, Dubray C *et al* (2009) Zika virus outbreak on Yap Island, Federated States of  
771 Micronesia. *The New England journal of medicine* 360: 2536-2543  
772 Elomaa O, Kangas M, Sahlberg C, Tuukkanen J, Sormunen R, Liakka A, Thesleff I, Kraal G,  
773 Tryggvason K (1995) Cloning of a Novel Bacteria-Binding Receptor Structurally Related to  
774 Scavenger Receptors and Expressed in a Subset of Macrophages. *Cell* 80: 603-609  
775 Farrell HE, Davis-Poynter N, Bruce K, Lawler C, Dolken L, Mach M, Stevenson PG (2015) Lymph  
776 Node Macrophages Restrict Murine Cytomegalovirus Dissemination. *J Virol* 89: 7147-7158  
777 Fros JJ, Pijlman GP (2016) Alphavirus Infection: Host Cell Shut-Off and Inhibition of Antiviral  
778 Responses. *Viruses* 8  
779 Fu R, Gillen AE, Sheridan RM, Tian C, Daya M, Hao Y, Hesselberth JR, Riemondy KA (2020)  
780 clustifyr: an R package for automated single-cell RNA sequencing cluster classification.  
781 *F1000Res* 9: 223  
782 Fujimoto N, He Y, D'Addio M, Tacconi C, Detmar M, Dieterich LC (2020) Single-cell mapping  
783 reveals new markers and functions of lymphatic endothelial cells in lymph nodes. *PLoS Biol* 18:  
784 e3000704  
785 Ghosh S, Gregory D, Smith A, Kobzik L (2011) MARCO regulates early inflammatory responses  
786 against influenza: a useful macrophage function with adverse outcome. *Am J Respir Cell Mol Biol*  
787 45: 1036-1044  
788 Gonzalez SF, Lukacs-Kornek V, Kuligowski MP, Pitcher LA, Degen SE, Kim YA, Cloninger MJ,  
789 Martinez-Pomares L, Gordon S, Turley SJ *et al* (2010) Capture of influenza by medullary dendritic  
790 cells via SIGN-R1 is essential for humoral immunity in draining lymph nodes. *Nat Immunol* 11:  
791 427-434



792 Gray EE, Cyster JG (2012) Lymph node macrophages. *J Innate Immun* 4: 424-436

793 Gupta P, Lai SM, Sheng J, Tetlak P, Balachander A, Claser C, Renia L, Karjalainen K, Ruedl C  
794 (2016) Tissue-Resident CD169(+) Macrophages Form a Crucial Front Line against Plasmodium  
795 Infection. *Cell Rep* 16: 1749-1761

796 Hawman DW, Carpentier KS, Fox JM, May NA, Sanders W, Montgomery SA, Moorman NJ,  
797 Diamond MS, Morrison TE (2017) Mutations in the E2 Glycoprotein and the 3' Untranslated  
798 Region Enhance Chikungunya Virus Virulence in Mice. *Journal of Virology* 91: 32-17

799 Hawman DW, Stoermer KA, Montgomery SA, Pal P, Oko L, Diamond MS, Morrison TE (2013)  
800 Chronic Joint Disease Caused by Persistent Chikungunya Virus Infection Is Controlled by the  
801 Adaptive Immune Response. *Journal of Virology* 87: 13878-13888

802 Heng TSP, M.W.; The Immunological Genome Project Consortium (2008) The Immunological  
803 Genome Project: network of gene expression in immune cells. *Nature Immunology* 9: 1091-1094

804 Hickey MJ, Kubes P (2009) Intravascular immunity: the host-pathogen encounter in blood  
805 vessels. *Nature Reviews Immunology* 9: 364-375

806 Hickman HD, Takeda K, Skon CN, Murray FR, Hensley SE, Loomis J, Barber GN, Bennink JR,  
807 Yewdell JW (2008) Direct priming of antiviral CD8+ T cells in the peripheral interfollicular region  
808 of lymph nodes. *Nat Immunol* 9: 155-165

809 High M, Cho H-Y, Marzec J, Wiltshire T, Verhein KC, Caballero MT, Acosta PL, Ciencewicki J,  
810 McCaw ZR, Kobzik L *et al* (2016) Determinants of host susceptibility to murine respiratory  
811 syncytial virus (RSV) disease identify a role for the innate immunity scavenger receptor MARCO  
812 gene in human infants. *EBIOM* 11: 73-84

813 Iannacone M, Moseman EA, Tonti E, Bosurgi L, Junt T, Henrickson SE, Whelan SP, Guidotti LG,  
814 von Andrian UH (2010) Subcapsular sinus macrophages prevent CNS invasion on peripheral  
815 infection with a neurotropic virus. *Nature* 465: 1079-1083

816 Jalkanen S, Salmi M (2020) Lymphatic endothelial cells of the lymph node. *Nat Rev Immunol* 20:  
817 566-578

818 Jenne CN, Kubes P (2013) Immune surveillance by the liver. *Nature Immunology* 14: 996-1006

819 Johnston LJ, Halliday GM, King NJ (2000) Langerhans cells migrate to local lymph nodes  
820 following cutaneous infection with an arbovirus. *J Invest Dermatol* 114: 560-568

821 Junt T, Moseman EA, Iannacone M, Massberg S, Lang PA, Boes M, Fink K, Henrickson SE,  
822 Shayakhmetov DM, Di Paolo NC *et al* (2007) Subcapsular sinus macrophages in lymph nodes  
823 clear lymph-borne viruses and present them to antiviral B cells. *Nature* 450: 110-114

824 Jupille HJ, Oko L, Stoermer KA, Heise MT, Mahalingam S, Gunn BM, Morrison TE (2011)  
825 Mutations in nsP1 and PE2 are critical determinants of Ross River virus-induced musculoskeletal  
826 inflammatory disease in a mouse model. *Virology* 410: 216-227

827 Kastenmuller W, Torabi-Parizi P, Subramanian N, Lammermann T, Germain RN (2012) A  
828 spatially-organized multicellular innate immune response in lymph nodes limits systemic  
829 pathogen spread. *Cell* 150: 1235-1248

830 Kedl RM, Lindsay RS, Finlon JM, Lucas ED, Friedman RS, Tamburini BAJ (2017) Migratory  
831 dendritic cells acquire and present lymphatic endothelial cell-archived antigens during lymph node  
832 contraction. *Nature Communications*: 1-15

833 Lanciotti RSL, M.L.; Rwaguma, E.B.; Lutwama, J.J.; Kram, T.M.; Karabatos, N.; Cropp, B.C.;  
834 Miller, B.R. (1998) Emergence of Epidemic O'nyong-nyong Fever in Uganda after a 35-Year  
835 Absence: Genetic Characterization of the Virus. *Virology*: 258-268

836 Lao W, Kang H, Jin G, Chen L, Chu Y, Sun J, Sun B (2017) Evaluation of the relationship between  
837 MARCO and CD36 single-nucleotide polymorphisms and susceptibility to pulmonary tuberculosis  
838 in a Chinese Han population. 1-9

839 Lee W-Y, Moriarty TJ, Wong CHY, Zhou H, Strieter RM, van Rooijen N, Chaconas G, Kubes P  
840 (2010) An intravascular immune response to *Borrelia burgdorferi* involves Kupffer cells and iNKT  
841 cells. *Nature Publishing Group* 11: 295-302

842 Lewis SM, Williams A, Eisenbarth SC (2019) Structure and function of the immune system in the  
843 spleen. *Science immunology* 4: eaau6085

844 Liu WJ, Rourke MF, Holmes EC, Aaskov JG (2011) Persistence of Multiple Genetic Lineages  
845 within Intra-host Populations of Ross River Virus. *Journal of Virology* 85: 5674-5678

846 Ma M-J, Wang H-B, Li H, Yang J-H, Yan Y, Xie L-P, Qi Y-C, Li J-L, Chen M-J, Liu W *et al* (2011)  
847 Genetic Variants in MARCO Are Associated with the Susceptibility to Pulmonary Tuberculosis in  
848 Chinese Han Population. *PLoS ONE* 6: e24069-24066

849 MacDonald GHJ, R.E. (2000) Role of Dendritic Cell Targeting in Venezuelan Equine Encephalitis  
850 Virus Pathogenesis. *Journal of Virology* 74: 914-922

851 MacLeod DT, Nakatsuji T, Wang Z, di Nardo A, Gallo RL (2015) Vaccinia virus binds to the  
852 scavenger receptor MARCO on the surface of keratinocytes. *The Journal of investigative*  
853 *dermatology* 135: 142-150

854 MacLeod DT, Nakatsuji T, Yamasaki K, Kobzik L, Gallo RL (2013) HSV-1 exploits the innate  
855 immune scavenger receptor MARCO to enhance epithelial adsorption and infection. *Nature*  
856 *Communications* 4: 1963

857 Maler MD, Nielsen PJ, Stichling N, Cohen I, Ruzsics Z, Wood C, Engelhard P, Suomalainen M,  
858 Gyory I, Huber M *et al* (2017) Key Role of the Scavenger Receptor MARCO in Mediating  
859 Adenovirus Infection and Subsequent Innate Responses of Macrophages. *mBio* 8: 855-815

860 Malhotra D, Fletcher AL, Astarita J, Lukacs-Kornek V, Tayalia P, Gonzalez SF, Elpek KG, Chang  
861 SK, Knoblich K, Hemler ME *et al* (2012) Transcriptional profiling of stroma from inflamed and  
862 resting lymph nodes defines immunological hallmarks. *Nat Immunol* 13: 499-510

863 McCarthy MK, Davenport BJ, Reynoso GV, Lucas ED, May NA, Elmore SA, Tamburini BA,  
864 Hickman HD, Morrison TE (2018) Chikungunya virus impairs draining lymph node function by  
865 inhibiting HEV-mediated lymphocyte recruitment. *JCI Insight* 3

866 Metsky HC, Matranga CB, Wohl S, Schaffner SF, Freije CA, Winnicki SM, West K, Qu J, Baniecki  
867 ML, Gladden-Young A *et al* (2017) Zika virus evolution and spread in the Americas. *Nature* 546:  
868 411-415

869 Miyake Y, Asano K, Kaise H, Uemura M, Nakayama M, Tanaka M (2007) Critical role of  
870 macrophages in the marginal zone in the suppression of immune responses to apoptotic cell-  
871 associated antigens. *J Clin Invest* 117: 2268-2278

872 Moro ML, Rezza G, Grilli E, Angelini R, Macini P, Spataro N, Gagliotti C, Massimiliani E, Sambri  
873 V, Pierro AM *et al* (2010) Chikungunya Virus in North-Eastern Italy: A Seroprevalence Survey.  
874 *The American Journal of Tropical Medicine and Hygiene* 82: 508-511

875 Musso D, Bossin H, Mallet HP, Besnard M, Broult J, Baudouin L, Levi JE, Sabino EC, Ghawche  
876 F, Lanteri MC *et al* (2018) Zika virus in French Polynesia 2013-14: anatomy of a completed  
877 outbreak. *The Lancet Infectious Diseases* 18: e172-e182

878 Pal P, Dowd KA, Brien JD, Edeling MA, Gorlatov S, Johnson S, Lee I, Akahata W, Nabel GJ,  
879 Richter MK *et al* (2013) Development of a highly protective combination monoclonal antibody  
880 therapy against Chikungunya virus. *PLoS Pathog* 9: e1003312

881 Pierson TC, Diamond MS (2018) The emergence of Zika virus and its new clinical syndromes.  
882 *Nature* 560: 573-581

883 Pinggen M, Bryden SR, Pondeville E, Schnettler E, Kohl A, Merits A, Fazakerley JK, Graham GJ,  
884 McKimmie CS (2016) Host Inflammatory Response to Mosquito Bites Enhances the Severity of  
885 Arbovirus Infection. *Immunity* 44: 1455-1469

886 Pozo-Aguilar JO, Monroy-Martínez V, Díaz D, Barrios-Palacios J, Ramos C, Ulloa-García A,  
887 García-Pillado J, Ruiz-Ordaz BH (2014) Evaluation of host and viral factors associated with  
888 severe dengue based on the 2009 WHO classification. *Parasites & vectors* 7: 590

889 Reynoso GV, Weisberg AS, Shannon JP, McManus DT, Shores L, Americo JL, Stan RV, Yewdell  
890 JW, Hickman HD (2019) Lymph node conduits transport virions for rapid T cell activation. *Nat*  
891 *Immunol* 20: 602-612

892 Rodda LB, Lu E, Bennett ML, Sokol CL, Wang X, Luther SA, Barres BA, Luster AD, Ye CJ, Cyster  
893 JG (2018) Single-Cell RNA Sequencing of Lymph Node Stromal Cells Reveals Niche-Associated  
894 Heterogeneity. *Immunity* 48: 1014-1028 e1016

895 Rodríguez-Morales AJ, Gil-Restrepo AF, Ramírez-Jaramillo V, Montoya-Arias CP, Acevedo-  
896 Mendoza WF, Bedoya-Arias JE, Chica-Quintero LA, Murillo-García DR, García-Robledo JE,  
897 Castrillón-Spitia JD *et al* (2016) Post-chikungunya chronic inflammatory rheumatism: results from  
898 a retrospective follow-up study of 283 adult and child cases in La Virginia, Risaralda, Colombia.  
899 *F1000Research* 5: 360

900 Schilte C, Staikowsky F, Staikovskiy F, Couderc T, Madec Y, Carpentier F, Kassab S, Albert ML,  
901 Lecuit M, Michault A (2013) Chikungunya virus-associated long-term arthralgia: a 36-month  
902 prospective longitudinal study. *PLOS Neglected Tropical Diseases* 7: e2137

903 Scott CL, Zheng F, De Baetselier P, Martens L, Saeys Y, De Prijck S, Lippens S, Abels C,  
904 Schoonooghe S, Raes G *et al* (2016) Bone marrow-derived monocytes give rise to self-renewing  
905 and fully differentiated Kupffer cells. *Nat Commun* 7: 10321

906 Seiler P, Aichele P, Odermatt B, Hengartner H, Zinkernagel RM, Schwendener RA (1997) Crucial  
907 role of marginal zone macrophages and marginal zone metallophilic cells in the clearance of  
908 lymphocytic choriomeningitis virus infection. *European Journal of Immunology* 27: 2626-2633

909 Soumahoro M-K, Boelle P-Y, Gaüzere B-A, Atsou K, Pelat C, Lambert B, La Ruche G, Gastellu-  
910 Etchegorry M, Renault P, Sarazin M *et al* (2011) The Chikungunya Epidemic on La Réunion Island  
911 in 2005–2006: A Cost-of-Illness Study. *PLOS Neglected Tropical Diseases* 5: e1197-1199

912 Stichling N, Suomalainen M, Flatt JW, Schmid M, Pacesa M, Hemmi S, Jungraithmayr W, Maler  
913 MD, Freudenberg MA, Pluckthun A *et al* (2018) Lung macrophage scavenger receptor SR-A6  
914 (MARCO) is an adenovirus type-specific virus entry receptor. *PLoS Pathog* 14: e1006914

915 Stoermer KA, Burrack A, Oko L, Montgomery SA, Borst LB, Gill RG, Morrison TE (2012) Genetic  
916 Ablation of Arginase 1 in Macrophages and Neutrophils Enhances Clearance of an Arthritogenic  
917 Alphavirus. *The Journal of Immunology* 189: 4047-4059

918 Takeda A, Hollmen M, Dermadi D, Pan J, Brulois KF, Kaukonen R, Lonnberg T, Bostrom P,  
919 Koskivuo I, Irjala H *et al* (2019) Single-Cell Survey of Human Lymphatics Unveils Marked

920 Endothelial Cell Heterogeneity and Mechanisms of Homing for Neutrophils. *Immunity* 51: 561-  
921 572 e565

922 Tamburini BA, Burchill MA, Kedl RM (2014) Antigen capture and archiving by lymphatic  
923 endothelial cells following vaccination or viral infection. *Nature Communications* 5: 1161-1131

924 Thuong NT, Tram TT, Dinh TD, Thai PV, Heemskerk D, Bang ND, Chau TT, Russell DG, Thwaites  
925 GE, Hawn TR *et al* (2016) MARCO variants are associated with phagocytosis, pulmonary  
926 tuberculosis susceptibility and Beijing lineage. *Genes Immun* 17: 419-425

927 Van Rooijen N, Sanders A (1994) Liposome mediated depletion of macrophages: mechanism of  
928 action, preparation of liposomes and applications. *Journal of immunological methods* 174: 83-93

929 Vanlandingham DLT, K.; Klingler, K.A.; Hong, C.; Mcelroy, K.L.; Lehane, M.J.; Higgs, S. (2006)  
930 Determinants of Vector Specificity of O'nyong nyong and Chikungunya Viruses in Anopheles and  
931 Aedes Mosquitoes. *Am J Trop Med Hyg* 74: 663-669

932 Vaughn DW, Green S, Kalayanaroj S, Innis BL, Nimmannitya S, Suntayakorn S, Endy TP,  
933 Raengsakulrach B, Rothman AL, Ennis FA *et al* (2000) Dengue viremia titer, antibody response  
934 pattern, and virus serotype correlate with disease severity. *Journal of Infectious Diseases* 181: 2-  
935 9

936 Vijayakumar K, George B, Anish TS, Rajasi RS, Teena MJ, Sujina CM (2013) Economic impact  
937 of chikungunya epidemic: out-of-pocket health expenditures during the 2007 outbreak in Kerala,  
938 India. *The Southeast Asian journal of tropical medicine and public health* 44: 54-61

939 Vokali E, Yu SS, Hirose S, Rincon-Restrepo M, F VD, Scherer S, Cortes-Henrioud P, Kilarski  
940 WW, Mondino A, Zehn D *et al* (2020) Lymphatic endothelial cells prime naive CD8(+) T cells into  
941 memory cells under steady-state conditions. *Nat Commun* 11: 538

942 Volk SM, Chen R, Tsetsarkin KA, Adams AP, Garcia TI, Sall AA, Nasar F, Schuh AJ, Holmes EC,  
943 Higgs S *et al* (2010) Genome-scale phylogenetic analyses of chikungunya virus reveal  
944 independent emergences of recent epidemics and various evolutionary rates. *Journal of Virology*  
945 84: 6497-6504

946 Vuong NL, Quyen NTH, Tien NTH, Tuan NM, Kien DTH, Lam PK, Tam DTH, Van Ngoc T, Yacoub  
947 S, Jaenisch T *et al* (2020) Higher plasma viremia in the febrile phase is associated with adverse  
948 dengue outcomes irrespective of infecting serotype or host immune status: an analysis of 5642  
949 Vietnamese cases. *Clin Infect Dis*

950 Waggoner JJ, Gresh L, Vargas MJ, Ballesteros G, Tellez Y, Soda KJ, Sahoo MK, Nuñez A,  
951 Balmaseda A, Harris E *et al* (2016) Viremia and Clinical Presentation in Nicaraguan Patients  
952 Infected With Zika Virus, Chikungunya Virus, and Dengue Virus. *Clinical Infectious Diseases* 63:  
953 1584-1590

954 Walsh SM, Sheridan RM, Lucas ED, Doan TA, Ware BC, Schafer J, Fu R, Burchill MA,  
955 Hesselberth JR, Tamburini BAJ (2021) Molecular tracking devices quantify antigen distribution  
956 and archiving in the murine lymph node. *Elife* 10

957 Weaver SC (2018) Prediction and prevention of urban arbovirus epidemics: A challenge for the  
958 global virology community. *ANTIVIRAL RESEARCH* 156: 80-84

959 Winkelmann ER, Widman DG, Xia J, Johnson AJ, van Rooijen N, Mason PW, Bourne N, Milligan  
960 GN (2014) Subcapsular sinus macrophages limit dissemination of West Nile virus particles after  
961 inoculation but are not essential for the development of West Nile virus-specific T cell responses.  
962 *Virology* 450-451: 278-289

963 Xiang M, Grosso RA, Takeda A, Pan J, Bekkhus T, Brulois K, Dermadi D, Nordling S,  
964 Vanlandewijck M, Jalkanen S *et al* (2020) A Single-Cell Transcriptional Roadmap of the Mouse  
965 and Human Lymph Node Lymphatic Vasculature. *Front Cardiovasc Med* 7: 52

966 Zeller H, Van Bortel W, Sudre B (2016) Chikungunya: Its History in Africa and Asia and Its Spread  
967 to New Regions in 2013–2014. *Journal of Infectious Diseases* 214: S436-S440

968 Zeng Z, Surewaard BGJ, Wong CHY, Geoghegan JA, Jenne CN, Kubes P (2016) CR1g Functions  
969 as a Macrophage Pattern Recognition Receptor to Directly Bind and Capture Blood-Borne Gram-  
970 Positive Bacteria. *Cell Host & Microbe* 20: 99-106

971 Zhang R, Earnest JT, Kim AS, Winkler ES, Desai P, Adams LJ, Hu G, Bullock C, Gold B, Cherry  
972 S *et al* (2019) Expression of the Mxra8 Receptor Promotes Alphavirus Infection and Pathogenesis  
973 in Mice and *Drosophila*. *Cell Rep* 28: 2647-2658 e2645

974 Zhang R, Kim AS, Fox JM, Nair S, Basore K, Klimstra WB, Rimkunas R, Fong RH, Lin H, Poddar  
975 S *et al* (2018) Mxra8 is a receptor for multiple arthritogenic alphaviruses. *Nature* 557: 570-574

976

977

978

979

980

981

982

983

984

985

986

987

988

989

990

991

992

993

994

995

996



997 **Figure Legends**

998 **Figure 1. CHIKV infection outcomes are more severe in MARCO<sup>-/-</sup> mice and viremia**

999 **and dissemination are enhanced. (A-B)** WT or MARCO<sup>-/-</sup> C57BL/6 mice were inoculated

1000 subcutaneously (s.c.) in the left rear footpad with 10<sup>3</sup> PFU of CHIKV or CHIKV E2 K200R. The

1001 percent of starting body weight **(A)** and disease score **(B)** were recorded daily over 14 days. Mean

1002 ± SEM. N=7-12, three experiments. Two-way ANOVA with Bonferroni's multiple comparison test;

1003 \*\*\*\**P* < 0.0001. **(C-E)** WT or MARCO<sup>-/-</sup> C57BL/6 mice were inoculated s.c. in the left rear footpad

1004 with 10<sup>3</sup> PFU of CHIKV. Serum collected on days 1, 2, 3, 5, 7, and 14 was analyzed by focus

1005 formation assay (FFA), mean ± SD **(C)** and by RT-qPCR, mean ± SD **(D)**. **(E)** Viral tissue burdens

1006 were analyzed at 1 day post inoculation (dpi) by FFA. Mean ± SEM. Two experiments, n=5-10.

1007 Two-way ANOVA with Bonferroni's multiple comparison test **(C-D)** or Mann-Whitney test **(E)**;

1008 \*\*\*\**P* < 0.0001. **(F-G)** WT or MARCO<sup>-/-</sup> C57BL/6 mice were inoculated s.c. in the left rear footpad

1009 with 10<sup>3</sup> PFU of ONNV **(F)** or RRV **(G)**. Tissues and serum were collected at 1 dpi and analyzed

1010 by plaque assay. Mean ± SEM. Two experiments, n= 8-10. Mann-Whitney test; \*\*\*\**P* < 0.0001.

1011

1012 **Figure 2. Depletion of Kupffer cells impedes CHIKV clearance from the circulation.**

1013 **(A)** WT and Clec4F-DTR<sup>+</sup> C57BL/6 mice were treated with diphtheria toxin (DT) either

1014 intraperitoneally (i.p.) 24 h prior to inoculation (n=10, two experiments, black dots) or intravenously

1015 (i.v.) 48 and 24 h prior to inoculation (n=4, one experiment, grey dots) to deplete KCs and

1016 inoculated i.v. with 10<sup>8</sup> CHIKV particles. Viral genomes in the inoculum and serum at 45 minutes

1017 (min)-post inoculation were determined by RT-qPCR. Mean ± SD. Three experiments, n= 14.

1018 Mann-Whitney test; \*\*\*\**P* < 0.0001. **(B)** WT or Clec-4F-DTR<sup>+</sup> C57BL/6 mice were treated i.v. with

1019 DT, PLL or CLL prior to i.v. inoculation of 10<sup>8</sup> CHIKV particles. Viral genomes were quantified as

1020 in (A). Mean ± SD. One experiment, n=4. Mann-Whitney test; \*\**P* < 0.01, \*\*\*\**P* < 0.0001. **(C)** WT

1021 or CD169-DTR<sup>+</sup> mice were treated i.p. with DT prior to i.v. inoculation of 10<sup>8</sup> CHIKV particles. Viral  
1022 genomes were quantified as in (A). Mean ± SD. Two experiments, n=7-8. Mann-Whitney test;  
1023 \*\*\**P* < 0.001. (D) Livers from WT, Clec4F-DTR<sup>+</sup> or CD169-DTR<sup>+</sup> mice treated i.p. with DT, or WT  
1024 mice treated i.v. with PLL or CLL were analyzed by IHC to visualize F4/80<sup>+</sup> macrophages (brown).  
1025 Representative sections are shown. (E) F4/80<sup>+</sup> cells in 10 randomly selected high-powered fields  
1026 (HPF) per liver section were counted to calculate average F4/80<sup>+</sup> cells per HPF. Mean ± SD. N=2-  
1027 4 mice per group.

1028

1029 **Figure 3. Depletion of KCs is not sufficient to enhance early CHIKV dissemination.**

1030 (A) WT or Clec4F-DTR<sup>+</sup> C57BL/6 mice were treated i.v. with DT prior to s.c. inoculation in the left  
1031 rear footpad with 10<sup>3</sup> PFU of CHIKV. Infectious virus was quantified at 24 hpi by FFA. Mean ±  
1032 SEM. Two experiments, n=8. Mann-Whitney test; *P* > 0.05. (B) WT C57BL/6 mice were treated  
1033 i.v. with PLL or CLL 42 h prior to s.c. inoculation in the left rear footpad with 10<sup>3</sup> PFU of CHIKV.  
1034 Infectious virus at 24 hpi was quantified by FFA. Mean ± SD. Two experiments, n=8. Mann-  
1035 Whitney test; \*\*\**P* < 0.001.

1036

1037 **Figure 4. The draining lymph node limits arthritogenic alphavirus dissemination. (A)**

1038 WT or LTα<sup>-/-</sup> mice were treated i.v. with PLL or CLL 42 h prior to s.c. inoculation of the left rear  
1039 footpad with 10<sup>3</sup> PFU of CHIKV. Infectious virus at 24 hpi was analyzed by FFA. Mean ± SEM.  
1040 Two experiments, n=8-10. Mann-Whitney test; \**P* < 0.05, \*\*\**P* < 0.001, \*\*\*\**P* < 0.0001. (B) WT or  
1041 MARCO<sup>-/-</sup> C57BL/6 mice were inoculated s.c. in the left rear footpad with 10<sup>8</sup> particles of WT  
1042 CHIKV or CHIKV E2 K200R. Viral genomes in the dLN and serum at 2 hpi were quantified by RT-  
1043 qPCR. Mean ± SD. Two experiments, n=10. Two-way ANOVA with Bonferroni's multiple  
1044 comparisons test; \*\*\**P* < 0.001, \*\*\*\**P* < 0.0001. (C) WT or MARCO<sup>-/-</sup> C57BL/6 mice were

1045 inoculated s.c. in the left rear footpad with  $10^8$  particles of RRV. Viral genomes in the dLN and  
1046 serum were quantified by RT-qPCR. Mean  $\pm$  SD. Two experiments, n=8-9. Mann-Whitney test;  
1047 \*\*\* $P < 0.001$ , \*\*\*\* $P < 0.0001$ .

1048

1049 **Figure 5. Macrophages in the dLN are not required for CHIKV accumulation in the**  
1050 **dLN or limiting viral dissemination. (A)** CD169-DTR<sup>+</sup> mice were treated i.p. with PBS or DT  
1051 prior to collection of the popliteal LN. Frozen LN sections were stained for CD169<sup>+</sup> macrophages  
1052 (green), B220<sup>+</sup> B cells (blue) or ERTR-7<sup>+</sup> stromal cells (red). **(B)** WT or CD169-DTR<sup>+</sup> C57BL/6  
1053 mice were treated i.p. with DT prior to s.c. inoculation in the left rear footpad with  $10^8$  particles of  
1054 WT CHIKV. Viral genomes in the dLN and serum at 2 hpi were quantified by RT-qPCR. Mean  $\pm$   
1055 SD. Two experiments, n=8. Mann-Whitney test;  $P > 0.05$ . **(C)** WT or CD169-DTR<sup>+</sup> C57BL/6 mice  
1056 were treated i.p. with DT prior to s.c. inoculation in the left rear footpad with  $10^3$  PFU of CHIKV.  
1057 Infectious virus at 24 hpi was quantified by FFA. Mean  $\pm$  SEM. Two experiments, n=9-10. Mann-  
1058 Whitney test; \*\* $P < 0.01$ .

1059

1060 **Figure 6. MARCO<sup>+</sup> LECs capture lymph-borne CHIKV particles.** WT or MARCO<sup>-/-</sup>  
1061 C57BL/6 mice were inoculated s.c. in the rear feet with  $5 \times 10^4$  PFU of CHIKV-E2-mCherry and the  
1062 popliteal dLNs were collected at 2 hpi. **(A)** Frozen dLN sections were stained for Lyve-1<sup>+</sup> LECs  
1063 (white), MARCO (green), B220 (blue) and mCherry<sup>+</sup> CHIKV particles (red). **(B)** Representative  
1064 histograms of confocal images showing voxel intensities for Lyve1 and mCherry. **(C)** Percent of  
1065 Lyve1<sup>+</sup> voxels with mCherry signal; dots represent individual sections. **(D)** Higher magnification  
1066 confocal image of a WT lymph node section stained as in (A) **(E)** Higher magnification confocal  
1067 image of a MARCO<sup>-/-</sup> lymph node stained for CD11b<sup>+</sup> cells (white), mCherry<sup>+</sup> CHIKV particles

1068 (red), B220<sup>+</sup> B cells (blue), and CD169<sup>+</sup> macrophages (green). Data are representative of 2  
1069 experiments, n=6-9. One-way ANOVA with Tukey's multiple comparisons test; \*\*\*\**P*<0.0001.

1070

1071 **Figure 7. MARCO<sup>+</sup> LECs harbor CHIKV RNA** . WT C57BL/6 mice were s.c. inoculated  
1072 with PBS (mock, n=3) or 10<sup>3</sup> PFU of CHIKV (n = 3) in the left rear footpad. At 24 hpi, the dLN was  
1073 collected and enzymatically digested into a single cell suspension. Cells were enriched for CD45-  
1074 cells and analyzed by scRNA-seq as described in the materials and methods. **(A)** UMAP  
1075 projection shows each replicate for mock- and CHIKV-infected mice; the number of cells obtained  
1076 for each replicate is shown at the bottom. **(B)** UMAP projection shows annotated cell types (top)  
1077 and the proportion of cells identified for each cell type (bottom). **(C)** UMAP projection shows  
1078 endothelial subtypes (top) and the proportion of cells identified for each cell type (bottom). Non-  
1079 endothelial cells are shown in white. **(D)** UMAP projection shows Marco expression. **(E)** UMAP  
1080 projection shows the fraction of counts that align to the CHIKV genome. **(F)** UMAP projection  
1081 shows cell types for cells classified as CHIKV-high. CHIKV-low cells are shown in white. The  
1082 proportion of CHIKV-high cells belonging to each cell type is shown on the right. **(G)** The fraction  
1083 of counts that align to the CHIKV genome is shown for CHIKV-high cells. Only cell types that  
1084 include >20 cells are shown. **(H, I)** MARCO **(H)** and Mxra8 **(I)** expression is shown for MARCO<sup>+</sup>  
1085 LECs for mock-infected cells and CHIKV-infected cells classified as either CHIKV-low or CHIKV-  
1086 high. *P*-values were calculated using a two-sided Wilcoxon rank-sum test with Bonferroni  
1087 correction.

1088

1089

1090

1091

1092

1093 **Supplemental Figure Legends**

1094 **Figure S1. CHIKV tissue burdens in distal tissues are enhanced in MARCO<sup>-/-</sup> mice at**  
1095 **days 3, 7 and 14 pi. (A-C)** WT or MARCO<sup>-/-</sup> C57BL/6 mice were inoculated subcutaneously in  
1096 the left rear footpad with 10<sup>3</sup> PFU of CHIKV. Viral tissue burdens were analyzed at 3 **(A)**, 7 **(B)**  
1097 and 14 **(C)** days post inoculation (dpi) by FFA (A), or RT-qPCR (B and C). Mean ± SEM Two  
1098 experiments for each time point, n= 10. Mann-Whitney test; \**P* < 0.05, \*\*\**P* < 0.001, \*\*\*\**P* <  
1099 0.0001.

1100  
1101 **Figure S2. MARCO is expressed by medullary sinus macrophages and LECs in LNs.**  
1102 LNs were pooled from uninfected WT or MARCO<sup>-/-</sup> C57BL/6 mice. Representative flow plots and  
1103 percentages of MARCO expressing cells by resident macrophage populations (A, C) and stromal  
1104 cell populations (B, D) are shown. Mean ± SEM. Two experiments, n=4-5. Two-way ANOVA with  
1105 Bonferroni's multiple comparisons test; \*\**P* < 0.01, \*\*\*\**P* < 0.0001.

1106  
1107 **Figure S3. Depletion of phagocytic cells in the lymph node and liver does not**  
1108 **enhance CHIKV dissemination.** WT C57BL/6 mice were i.v. injected with PLL or CLL 42 h prior  
1109 to virus inoculation and subcutaneously injected in the left rear footpad (FP) with PLL or CLL 24  
1110 h prior to virus inoculation as indicated. Mice were then inoculated s.c. with 10<sup>3</sup> PFU of CHIKV in  
1111 the left rear footpad, and tissues and serum were collected at 24 hpi. Infectious virus was  
1112 quantified by FFA. Mean ± SEM. Two experiment, n=8. Two-way ANOVA with Bonferroni's  
1113 multiple comparison test, comparing all groups to IV PLL+ FP PLL group; \*\**P* < 0.01, \*\*\*\**P* <  
1114 0.0001.

1115  
1116 **Figure S4. CHIKV-E2 mCherry is susceptible to clearance by a poly(I) sensitive**  
1117 **scavenger receptor.** WT C57BL/6 mice were treated i.v. with poly(C) or poly(I) 5 min prior to i.v.

1118 inoculation of  $10^8$  particles of CHIKV-E2 mCherry. Genomes in the inoculum and serum at 45 min  
1119 post-inoculation were quantified by RT-qPCR. Mean  $\pm$  SD. N=3, one experiment.

1120

1121 **Figure S5. CD45<sup>-</sup> cell enrichment.** Pre- and Post-CD45<sup>+</sup> cell depletion cell populations  
1122 were analyzed by flow cytometry. **(A)** Representative plots of gating strategy used. **(B-C)**  
1123 Representative flow plots of cell viability **(B)** and CD45<sup>+</sup> and CD45<sup>-</sup> cell populations **(C)** in pre-  
1124 and post depleted postulations. **(D)** Percentages of CD45<sup>+</sup> and CD45<sup>-</sup> subsets among replicates.  
1125 One experiment, n=3.

1126

1127 **Figure S6. LEC Annotations.** To assess the accuracy of endothelial cell type  
1128 annotations, the subtype assignments were compared back to the reference data. The correlation  
1129 with the reference RNA-seq data is shown for each subtype. Correlation coefficients (Spearman)  
1130 are shown for each subtype.

1131

1132 **Figure S7. CHIKV-high classification and gene expression among CHIKV-high and**  
1133 **CHIKV low cells.** **(A)** To identify cells with high amounts of viral RNA, cells were first filtered to  
1134 only include those with >5 CHIKV counts. K-means clustering was then used to independently  
1135 group each biological replicate into CHIKV-low and -high populations. Cells with  $\leq 5$  CHIKV  
1136 counts are included in the CHIKV-low group. CHIKV counts are shown below for each sample  
1137 before filtering low quality cells (this includes all captured cells). **(B)** Cell quality metrics are shown  
1138 for CHIKV-low and CHIKV-high cells for each replicate. These plots include all captured cells  
1139 before quality filtering. CHIKV-high cells have fewer expressed mouse genes and an increased  
1140 percentage of mitochondrial counts.

1141

1142

**Figure 1**

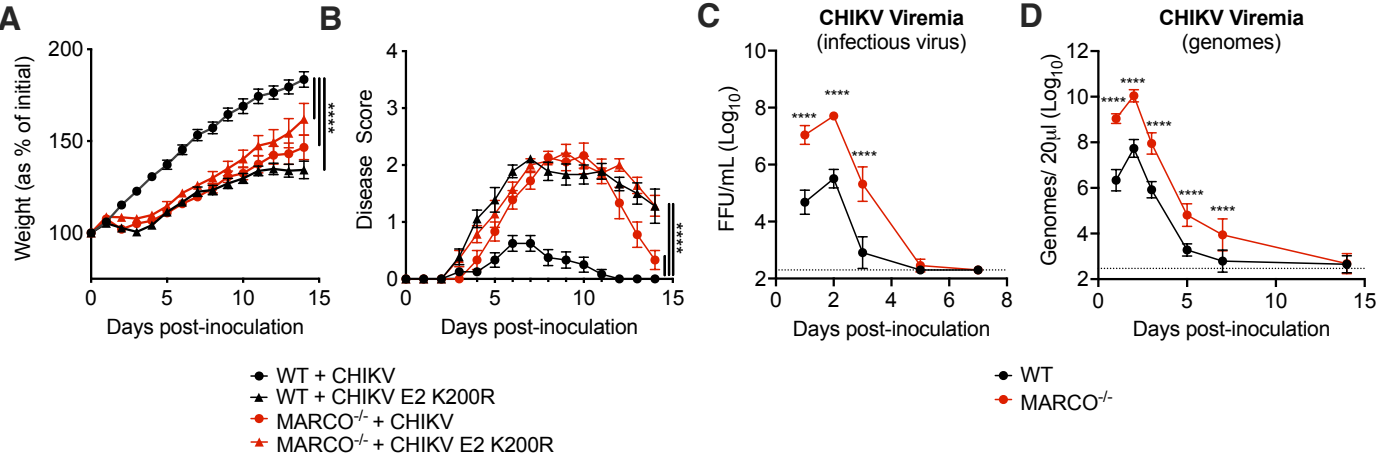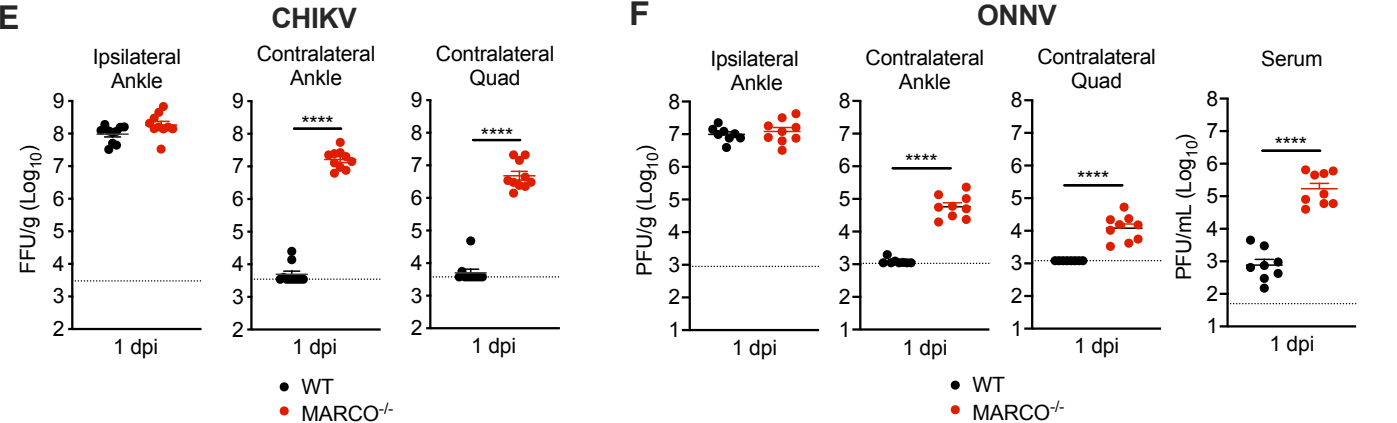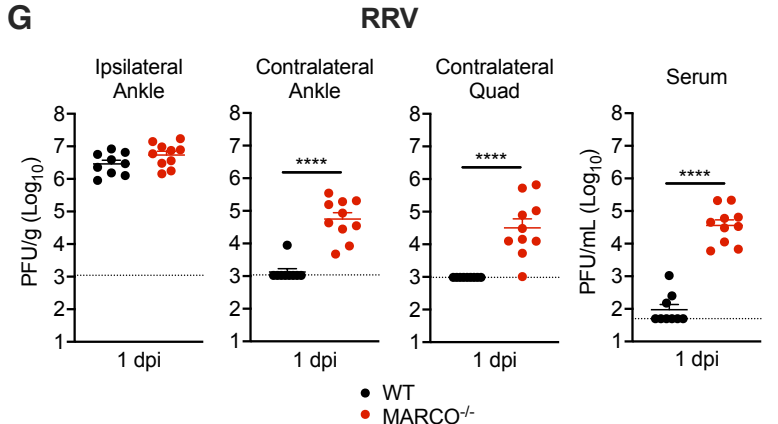

**Figure 2**

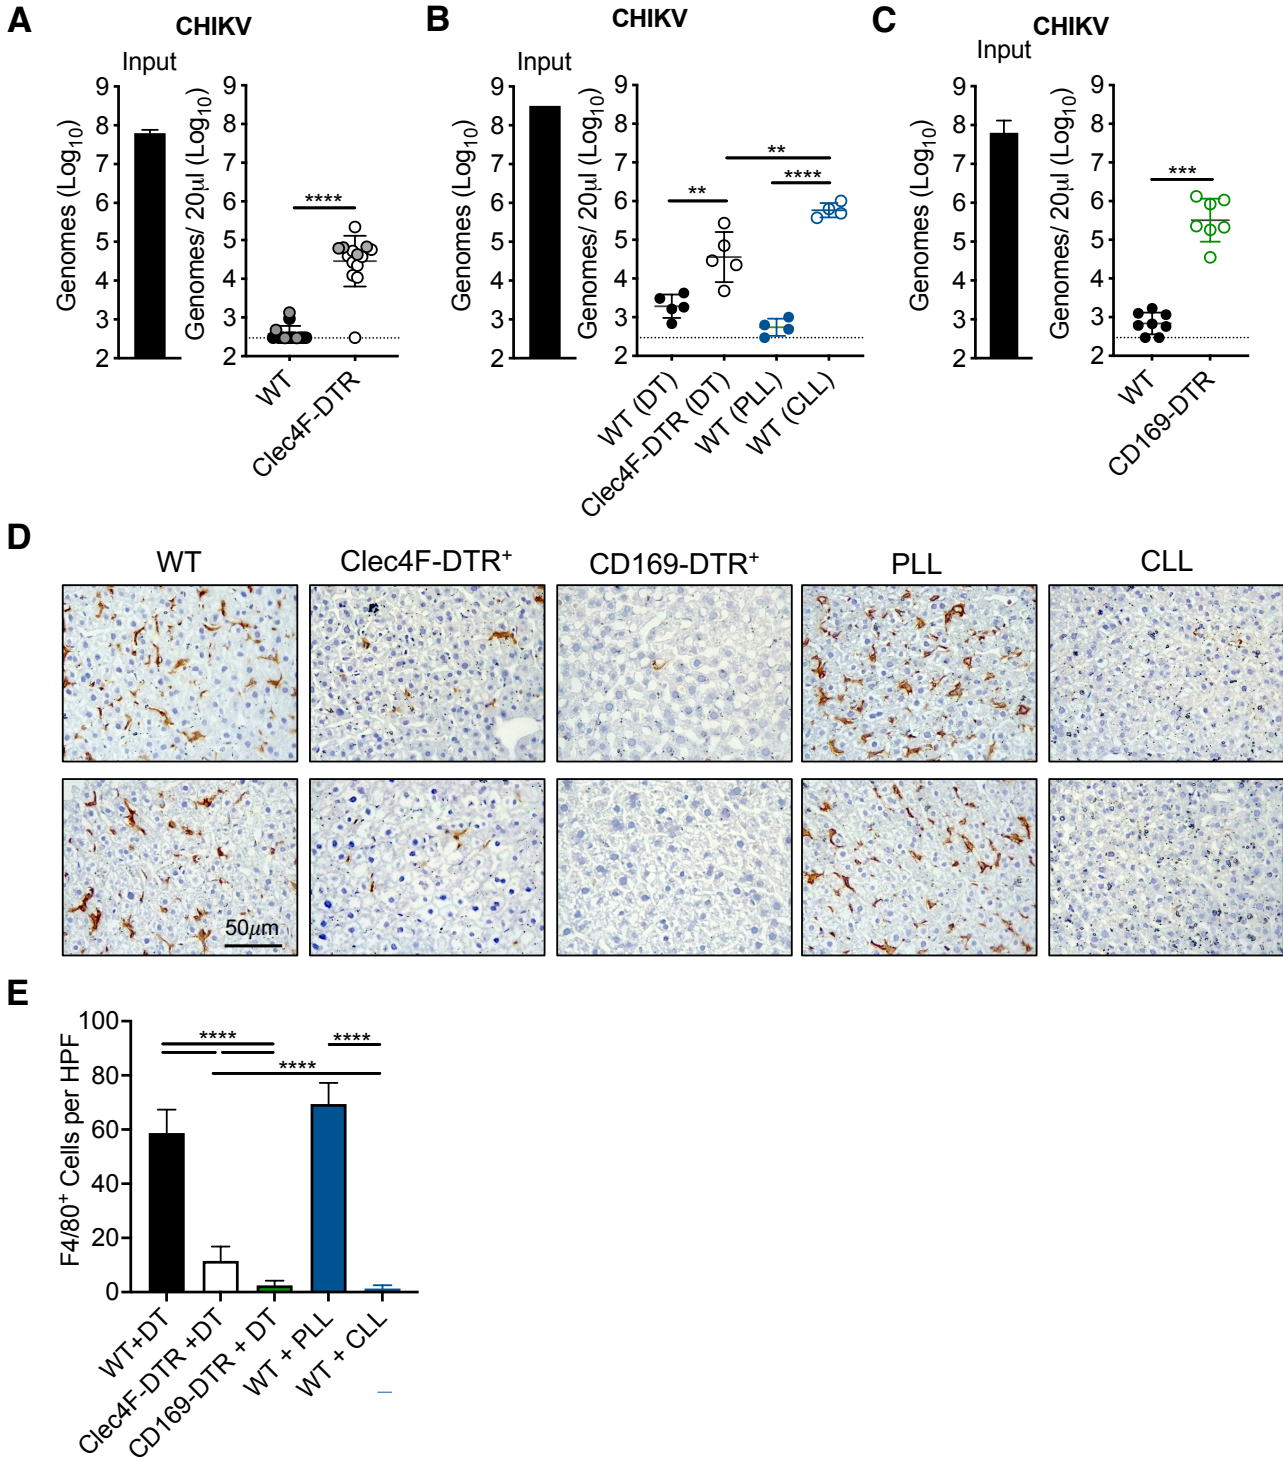



Figure 3

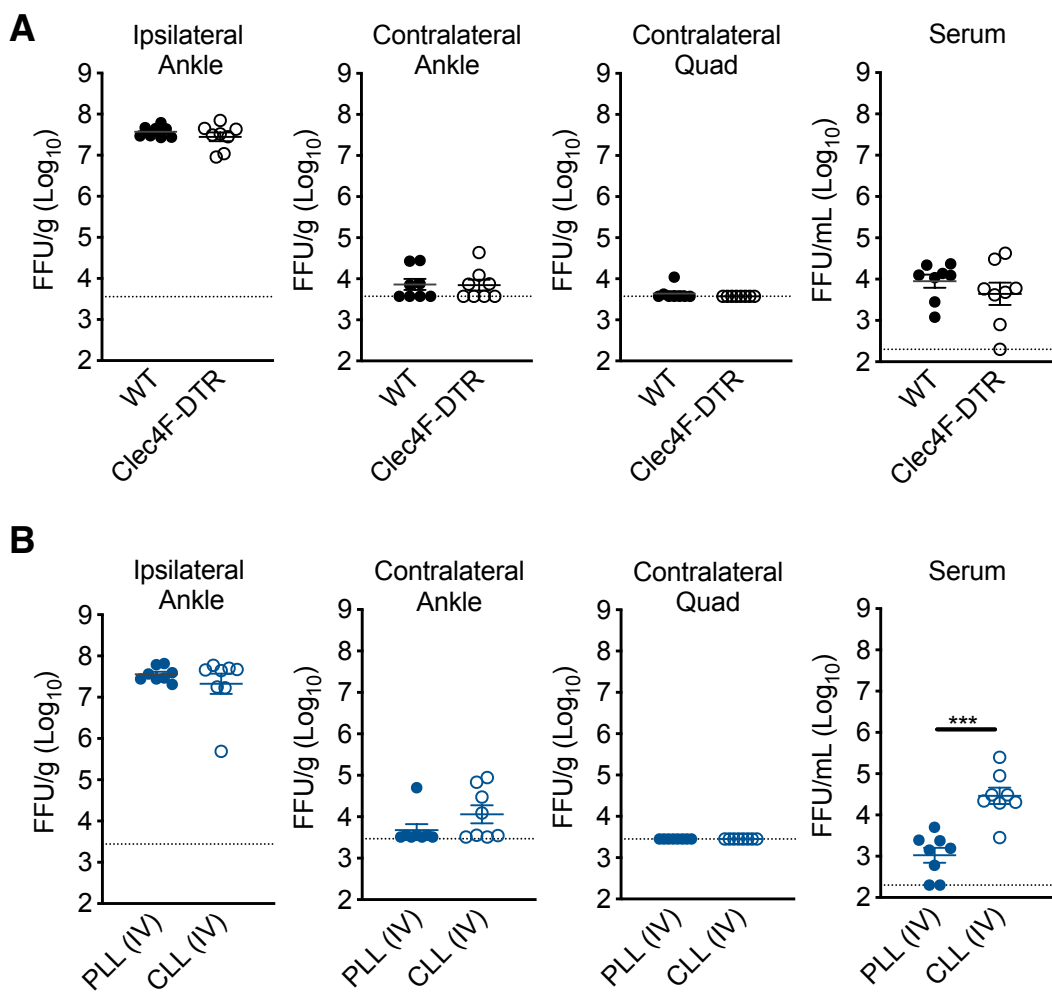

**Figure 4**

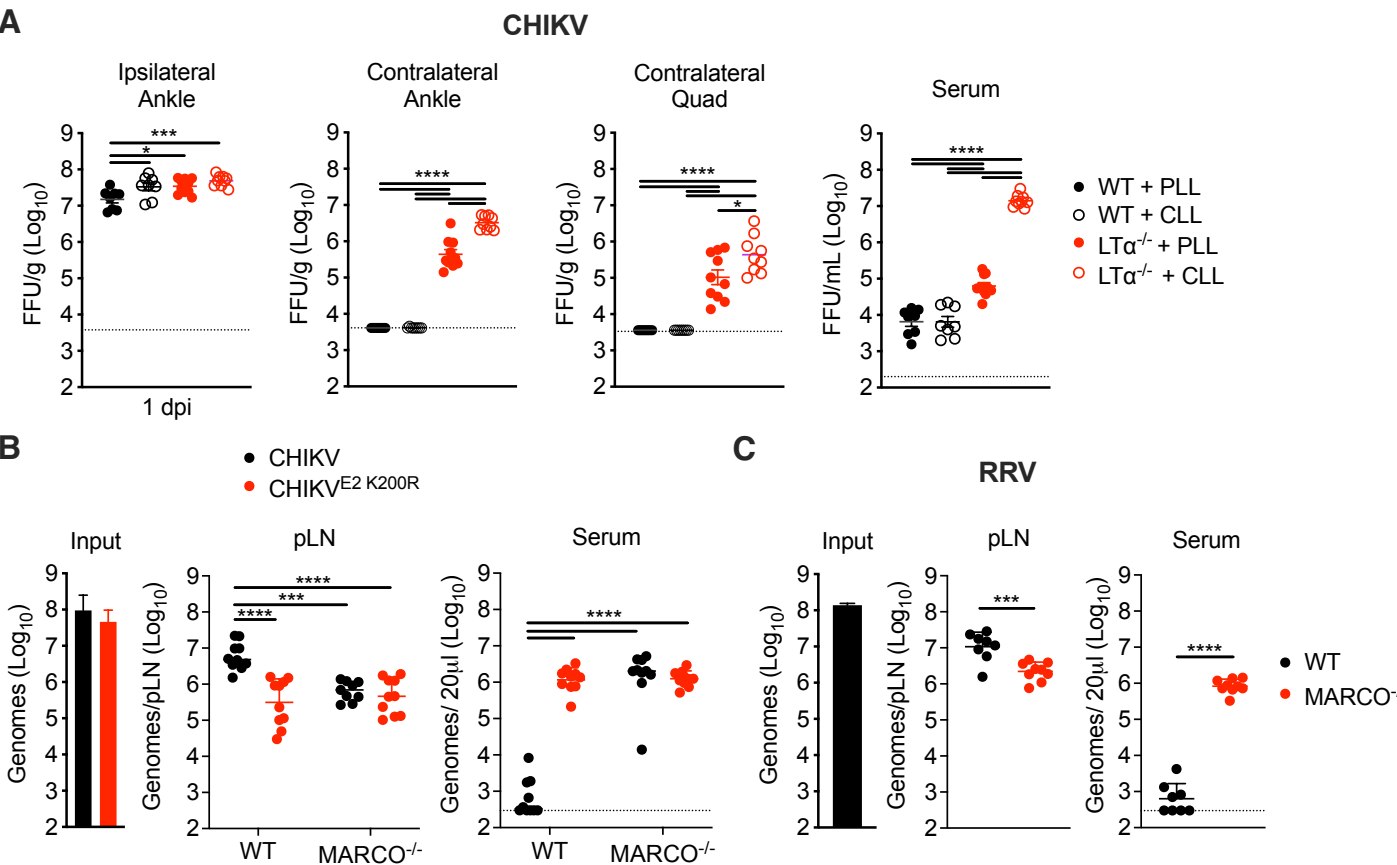

**Figure 5**

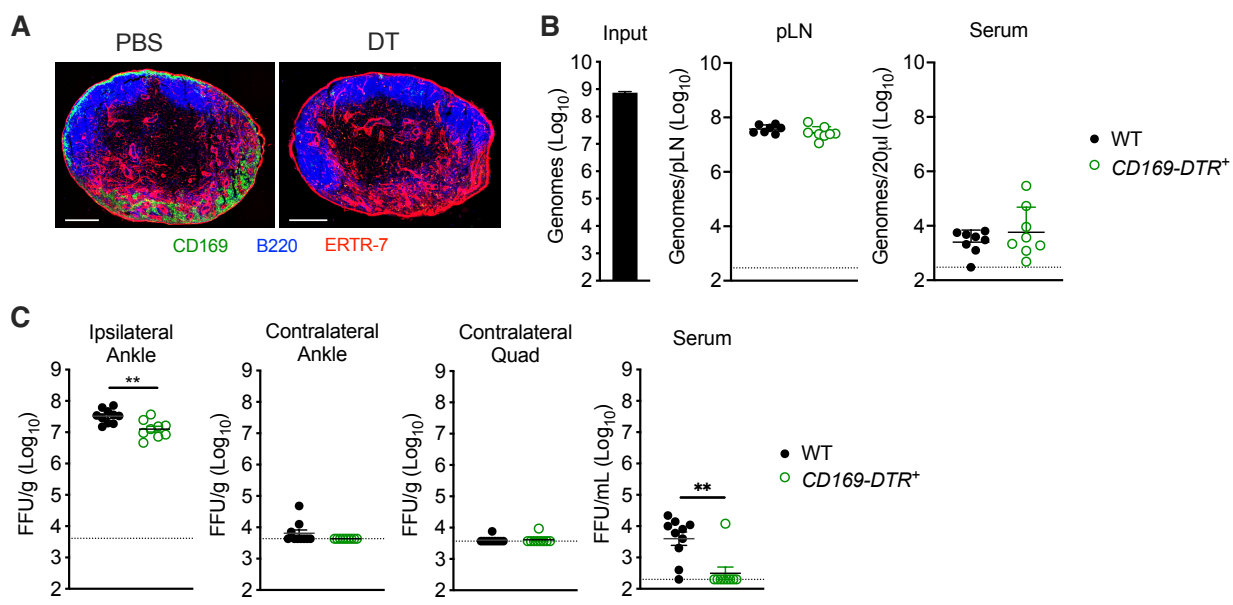



**Figure 7**

**A**

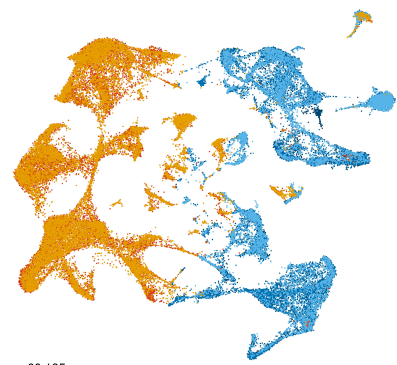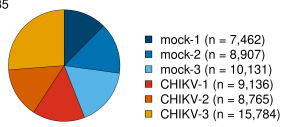

**B**

Cell types

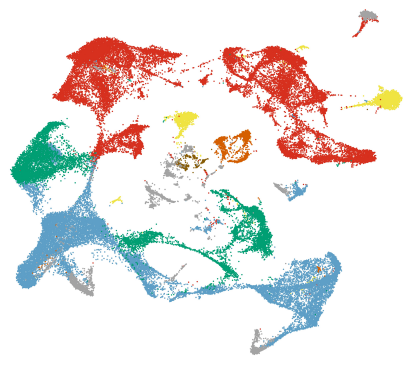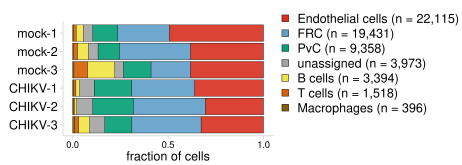

**C**

Endothelial cell types

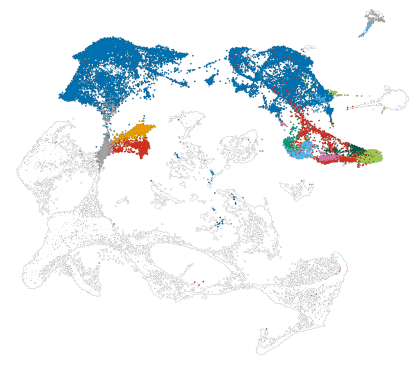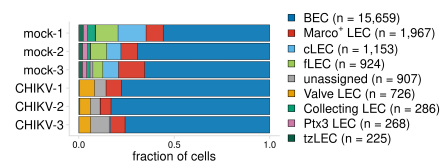

**D**

Marco expression

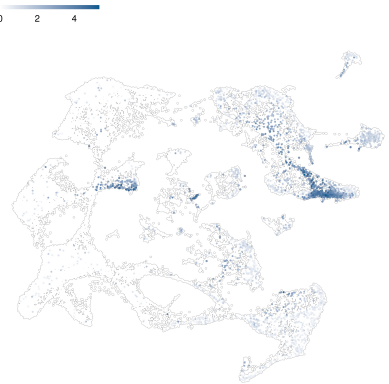

**E**

fraction CHIKV counts

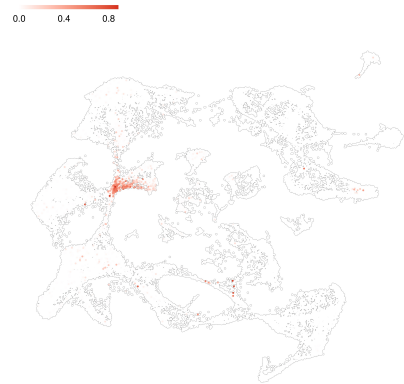

**F**

CHIKV-high cell types

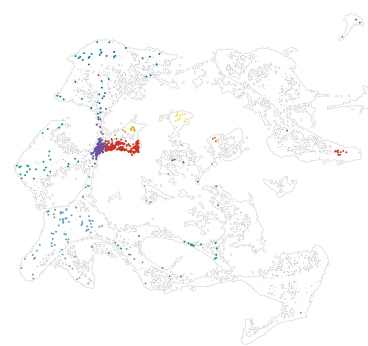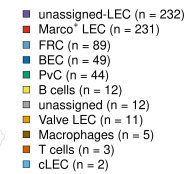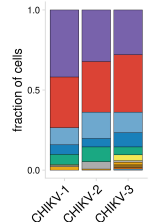

**G**

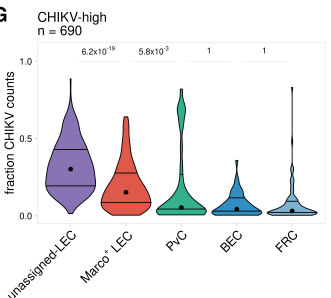

**H**

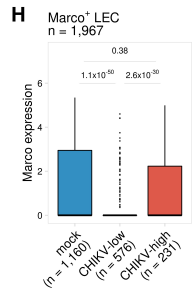

**I**

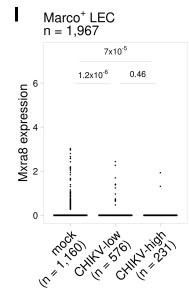

Source: https://www.biorxiv.org/content/10.1101/2021.06.10.447957v1.full.pdf
